# Supplementary material for: Volumetric assessment of extracranial carotid artery aneurysms
Source: PubMed Central journal article supplement (PMC6542789; doi:10.1038/s41598-019-44553-0), 2019-05-30

## Supplementary information

**Manuscript title:** Volumetric assessment of extracranial carotid artery aneurysms

**Authors:** EE de Vries<sup>a</sup>, CJHCM van Laarhoven<sup>a</sup>, HJ Kuijf, CEVB Hazenberg, JA van Herwaarden, MA Viergever, GJ de Borst

<sup>a</sup> both authors contributed equally

### Contents

|                                                   |       |
|---------------------------------------------------|-------|
| APPENDIX A: <i>schematic overview of 20 cases</i> | p. 2  |
| APPENDIX B: <i>final 3D volume segmentations</i>  | p. 11 |
| APPENDIX C: <i>Bland-Altman plots</i>             | p. 32 |

## APPENDIX A

Schematic overview of the 20 cases, and subfield segmentations of each case according to measurement method 2 (the ECAA). Each case consists of 2 scans performed at different time points, adding to a total of 40 scans.

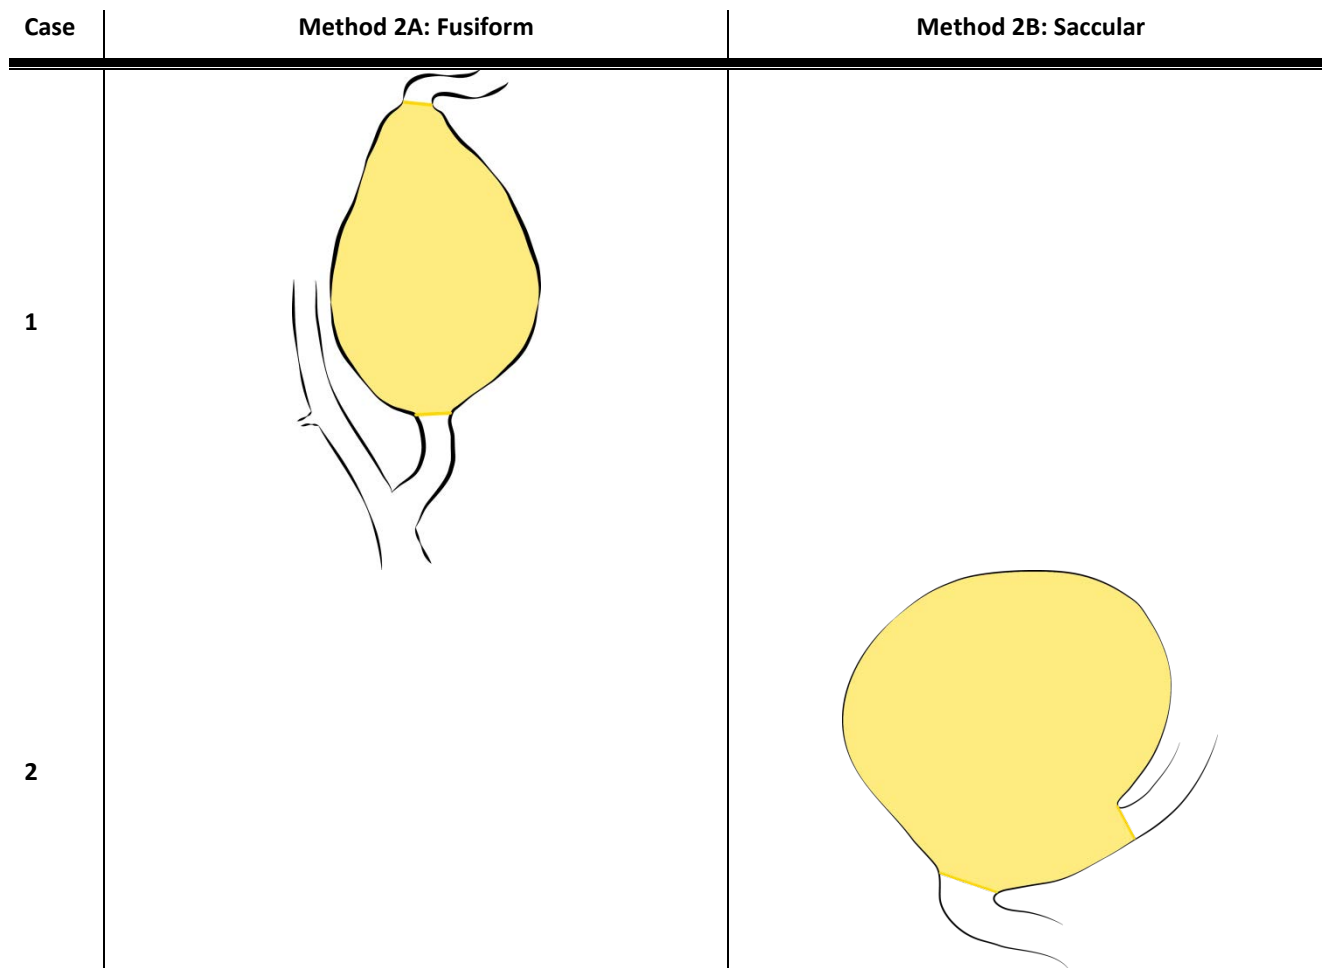

| Case | Method 2A: Fusiform | Method 2B: Saccular                                                                   |
|------|---------------------|---------------------------------------------------------------------------------------|
| 3    |                     | 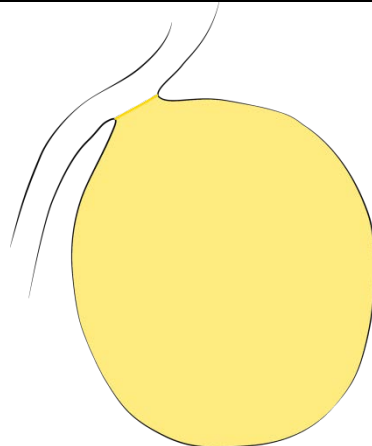   |
| 4    |                     |    |
| 5    |                     |  |

| Case | Method 2A: Fusiform | Method 2B: Saccular                                                                  |
|------|---------------------|--------------------------------------------------------------------------------------|
| 6    |                     | 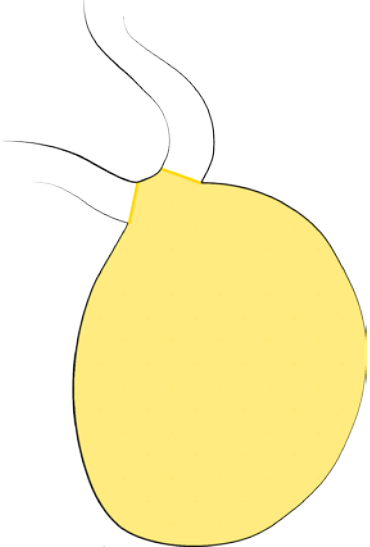  |
| 7    |                     |  |

| Case | Method 2A: Fusiform                                                                | Method 2B: Saccular                                                                 |
|------|------------------------------------------------------------------------------------|-------------------------------------------------------------------------------------|
| 8    |                                                                                    |  |
| 9    |  |                                                                                     |

| Case | Method 2A: Fusiform                                                                | Method 2B: Sacular                                                                  |
|------|------------------------------------------------------------------------------------|-------------------------------------------------------------------------------------|
| 10   |                                                                                    | 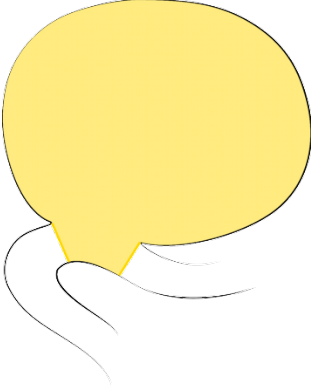 |
| 11   |  |                                                                                     |

| Case | Method 2A: Fusiform                                                                 | Method 2B: Sacular                                                                   |
|------|-------------------------------------------------------------------------------------|--------------------------------------------------------------------------------------|
| 12   |    |                                                                                      |
| 13   |                                                                                     |  |
| 14   |  |                                                                                      |

| Case | Method 2A: Fusiform | Method 2B: Saccular                                                                                                                                                 |
|------|---------------------|---------------------------------------------------------------------------------------------------------------------------------------------------------------------|
| 15   |                     | 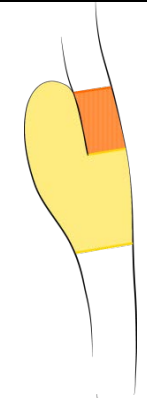 A diagram of a hand with a yellow fusiform shape and an orange saccular shape.  |
| 16   |                     |  A diagram of a hand with a yellow fusiform shape and an orange saccular shape. |



Case

Method 2A: Fusiform

Method 2B: Saccular

17

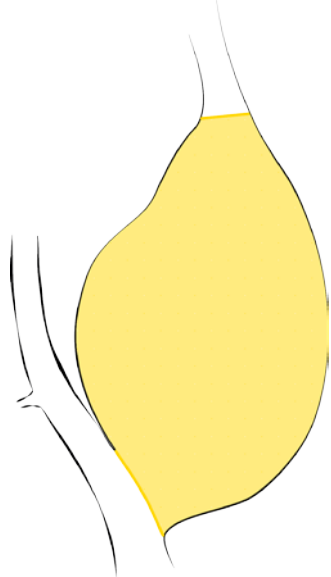

18

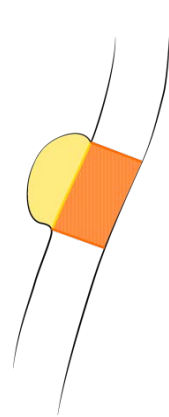

| Case | Method 2A: Fusiform                                                                | Method 2B: Saccular                                                                 |
|------|------------------------------------------------------------------------------------|-------------------------------------------------------------------------------------|
| 19   |                                                                                    | 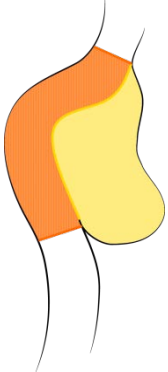 |
| 20   |  |                                                                                     |

## APPENDIX B

Final 3D volume segmentations of 20 cases. Each case consists of  $a$  and  $b$ , indicating the paired scans of the same case performed at different time points. In each scan, the segmentation of observer 1 is shown on the left, the segmentation of observer 2 on the right.

Color coding of subfields:

- only vessel = blue.
- aneurysm sac = yellow.
- vessel adjacent to aneurysm sac = orange.

Case 001a

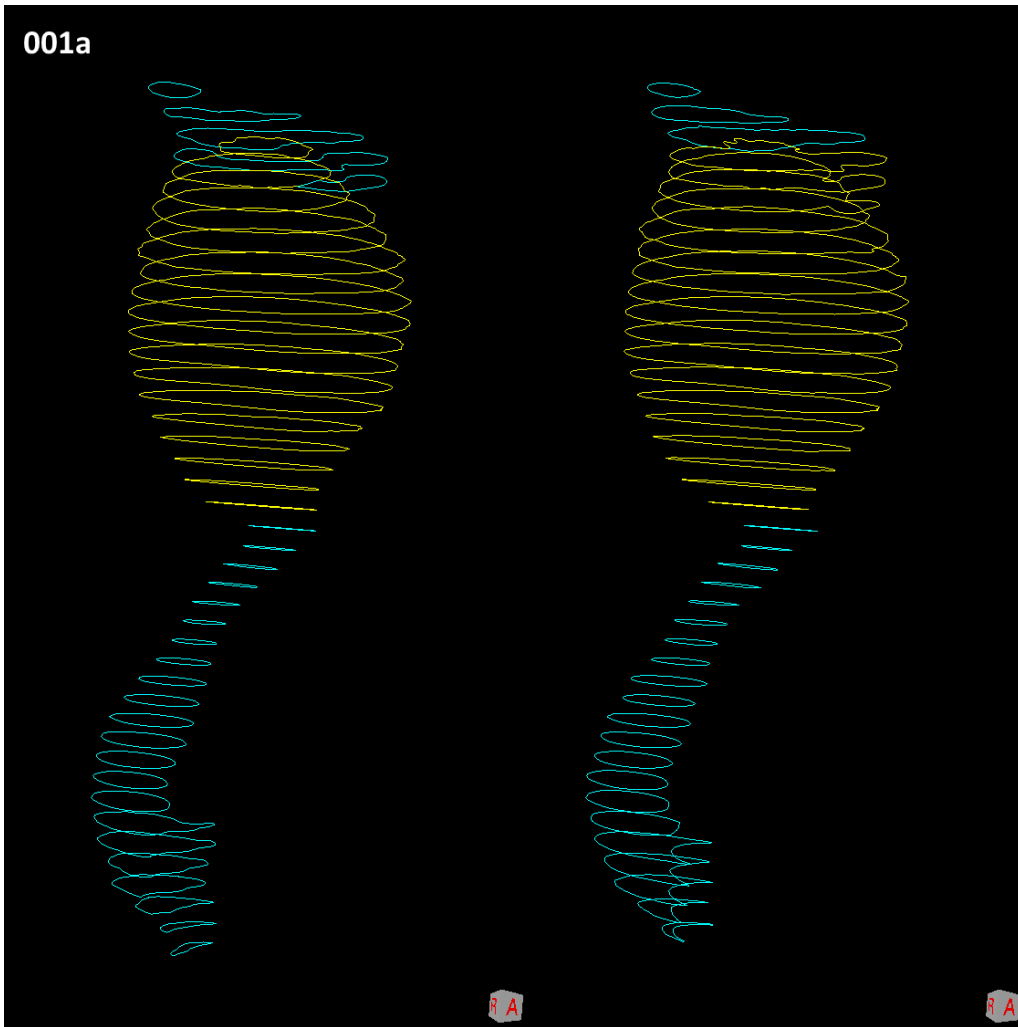

Case 001b

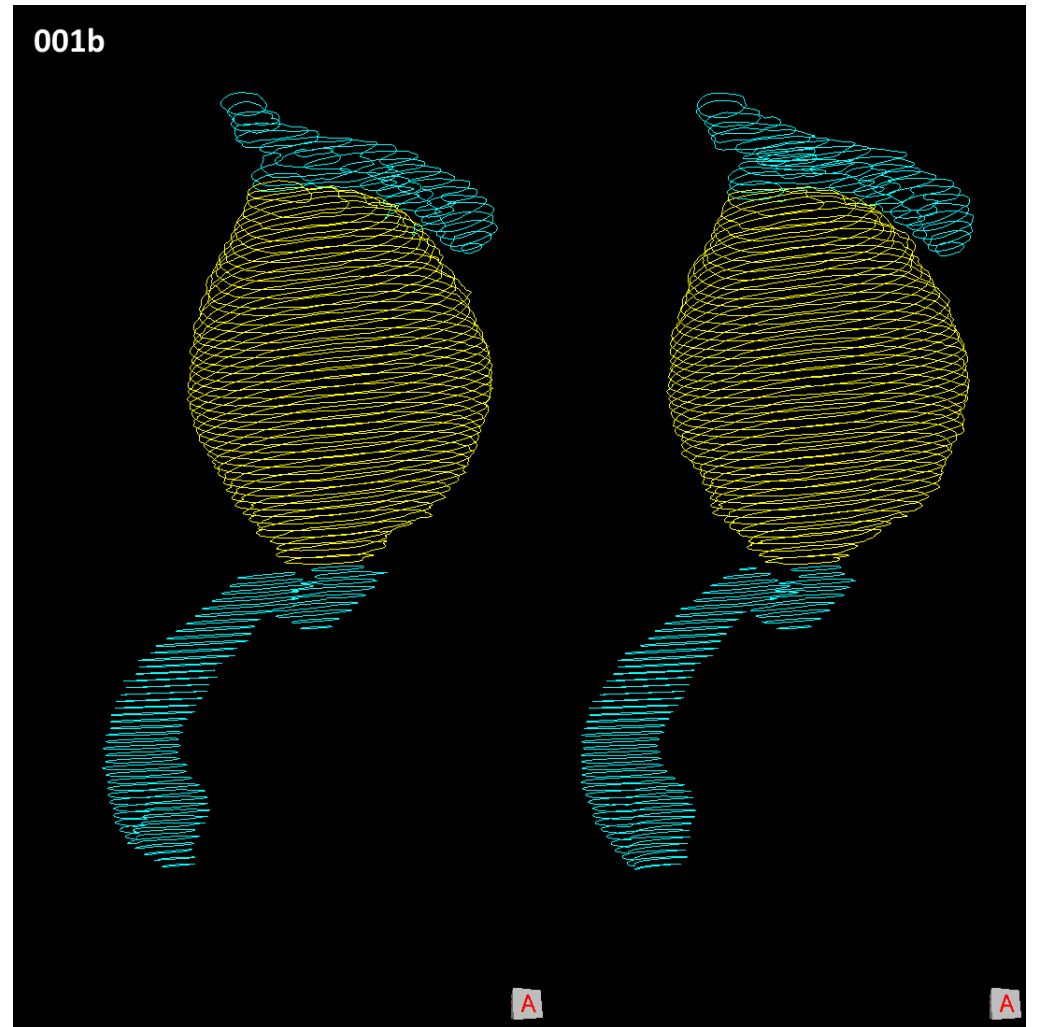

Case 002a

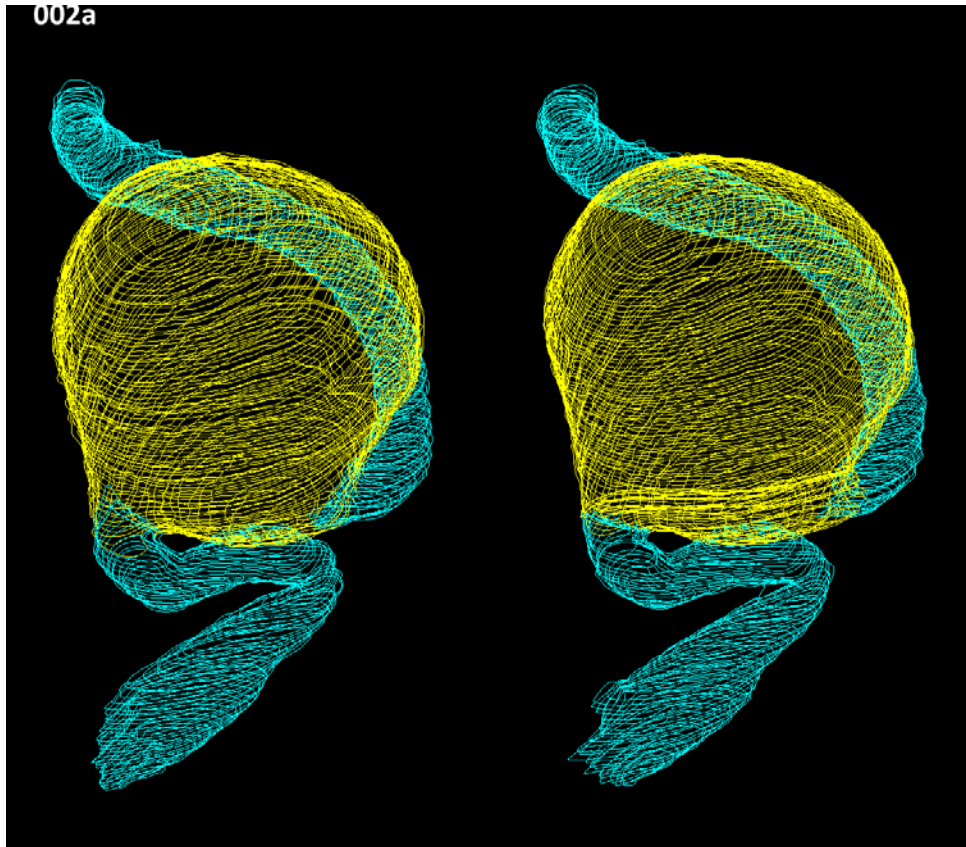

Case 002b

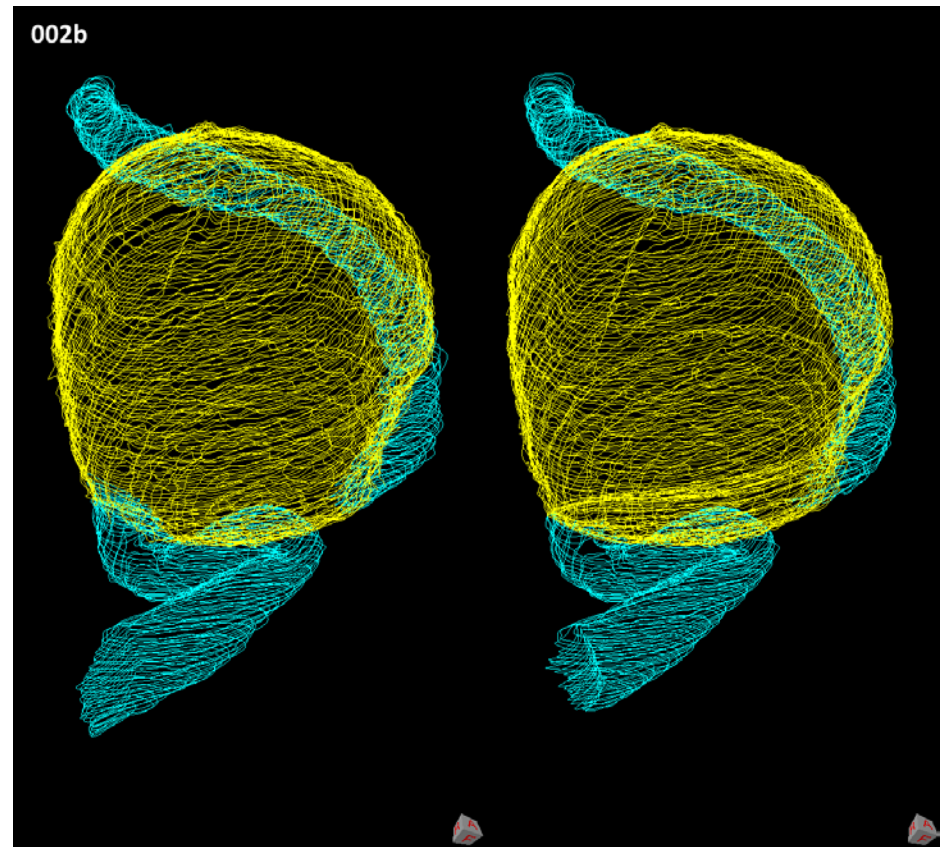

Case 003a

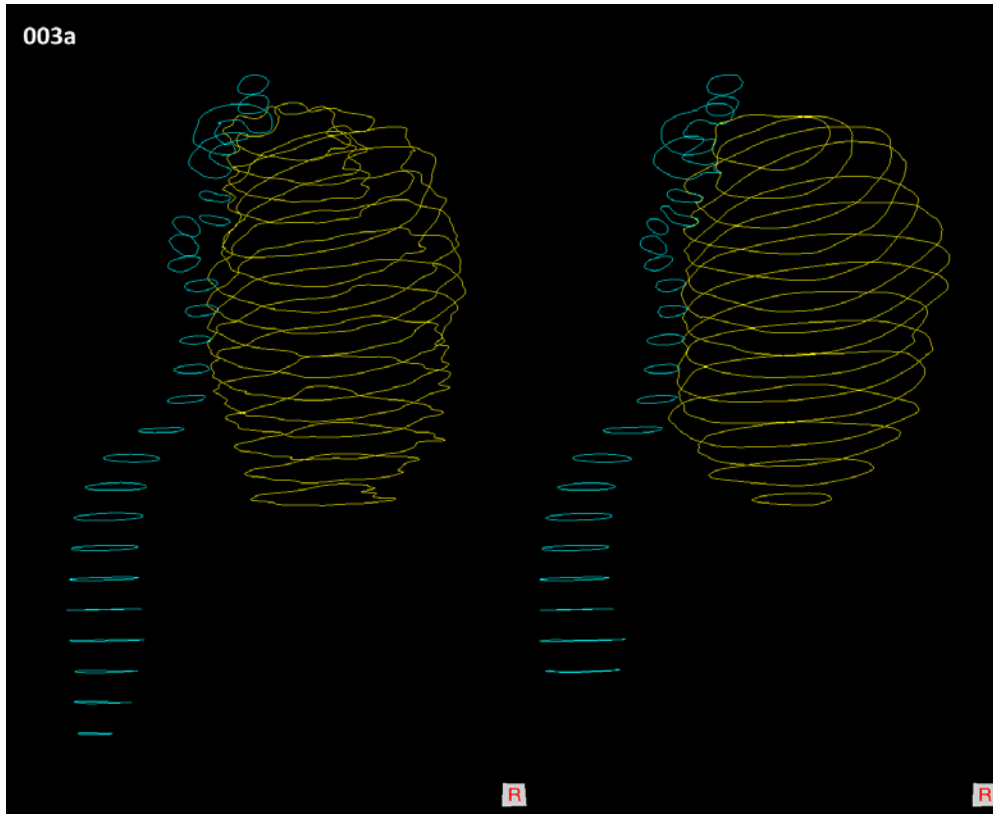

Case 003b

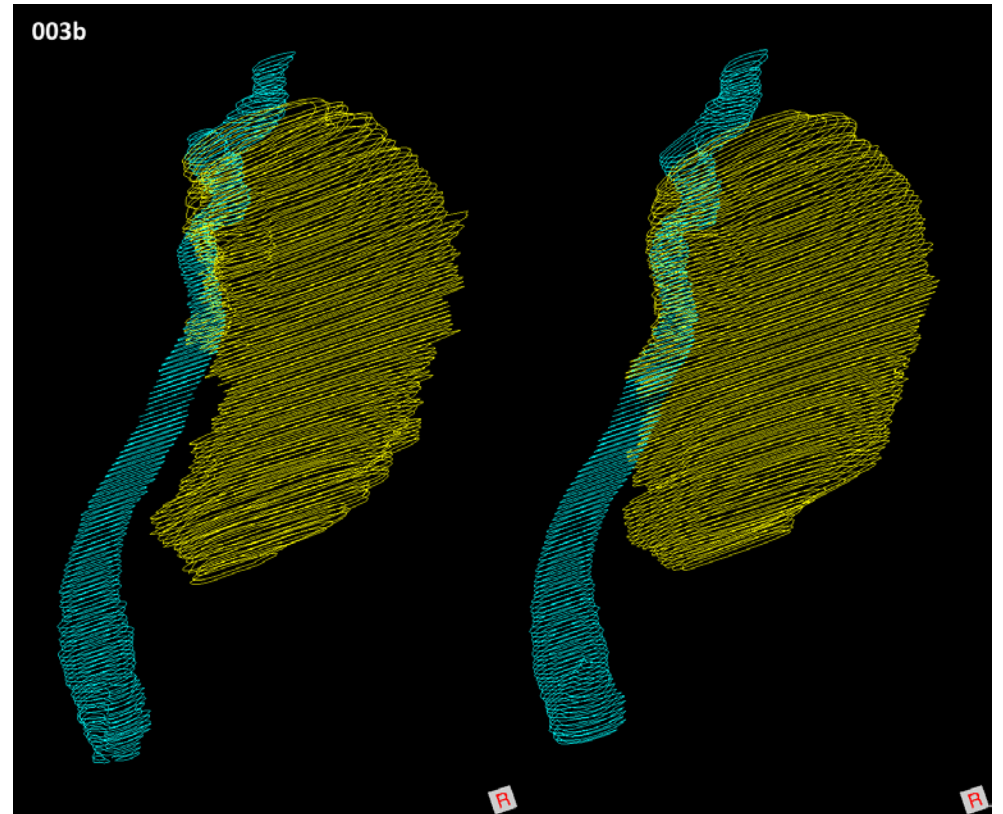

Case 004a

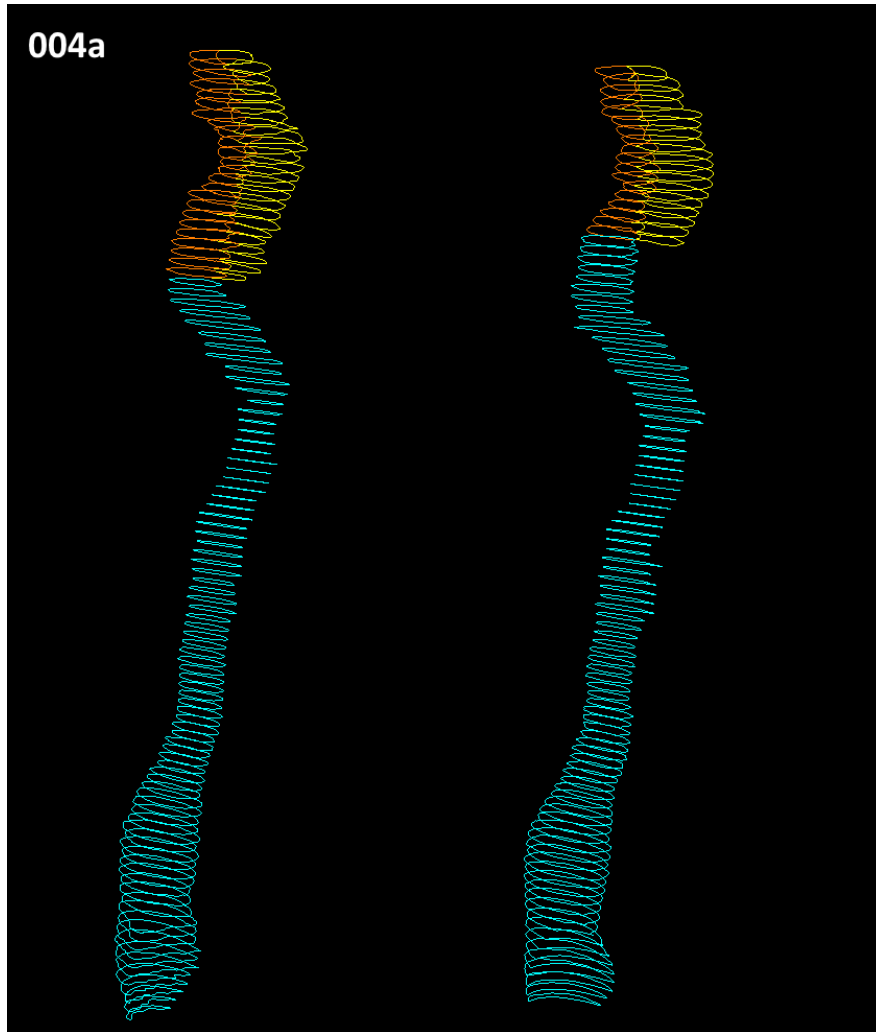

Case 004b

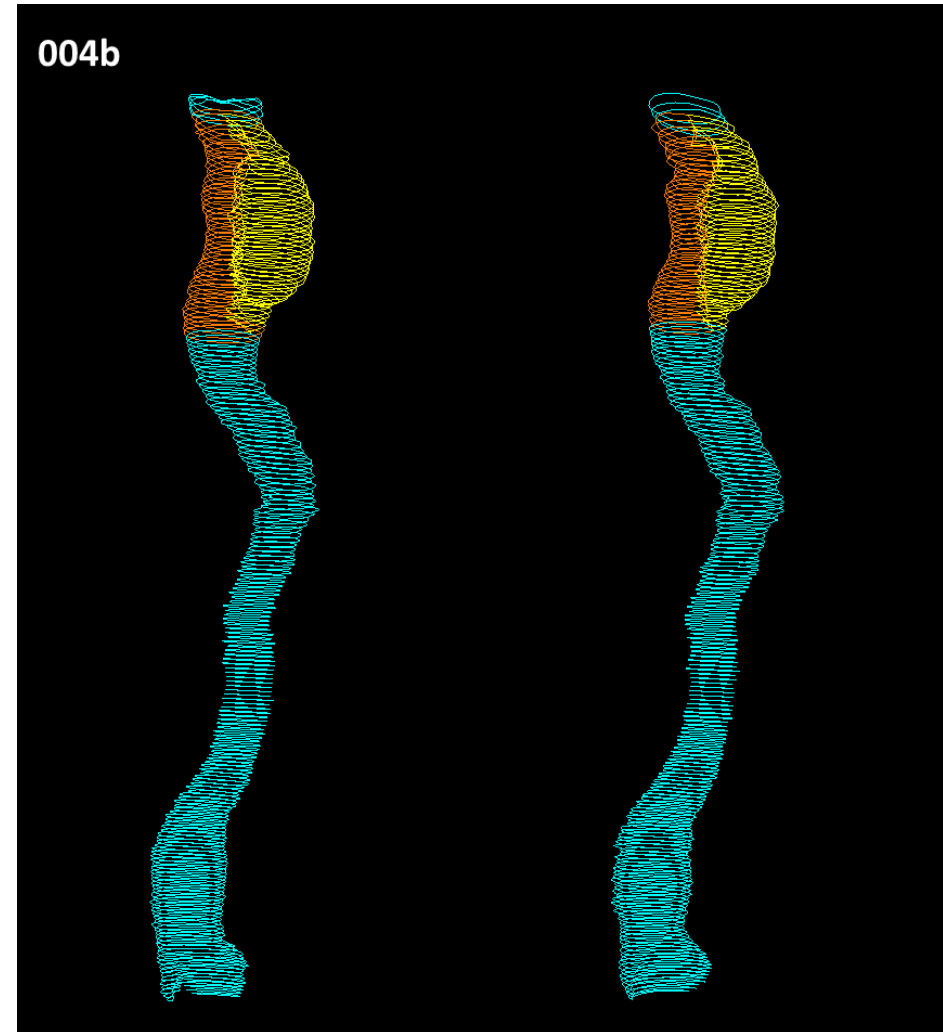

Case 005a

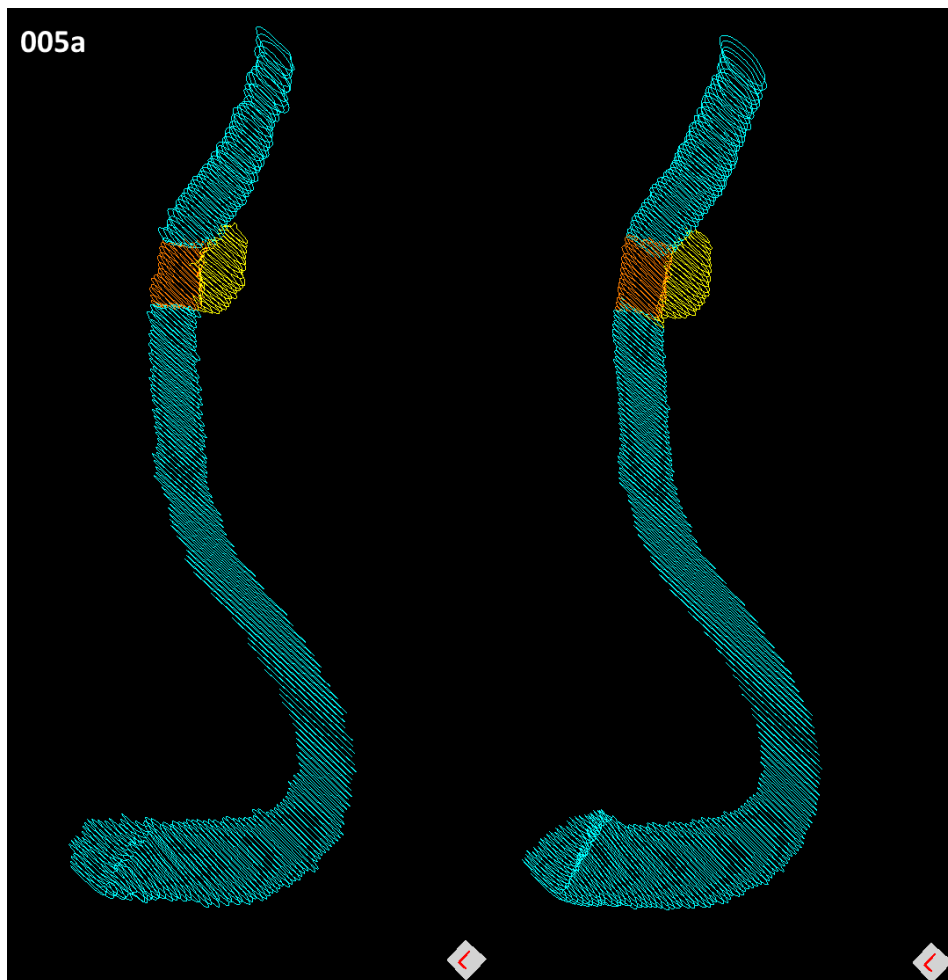

Case 005b

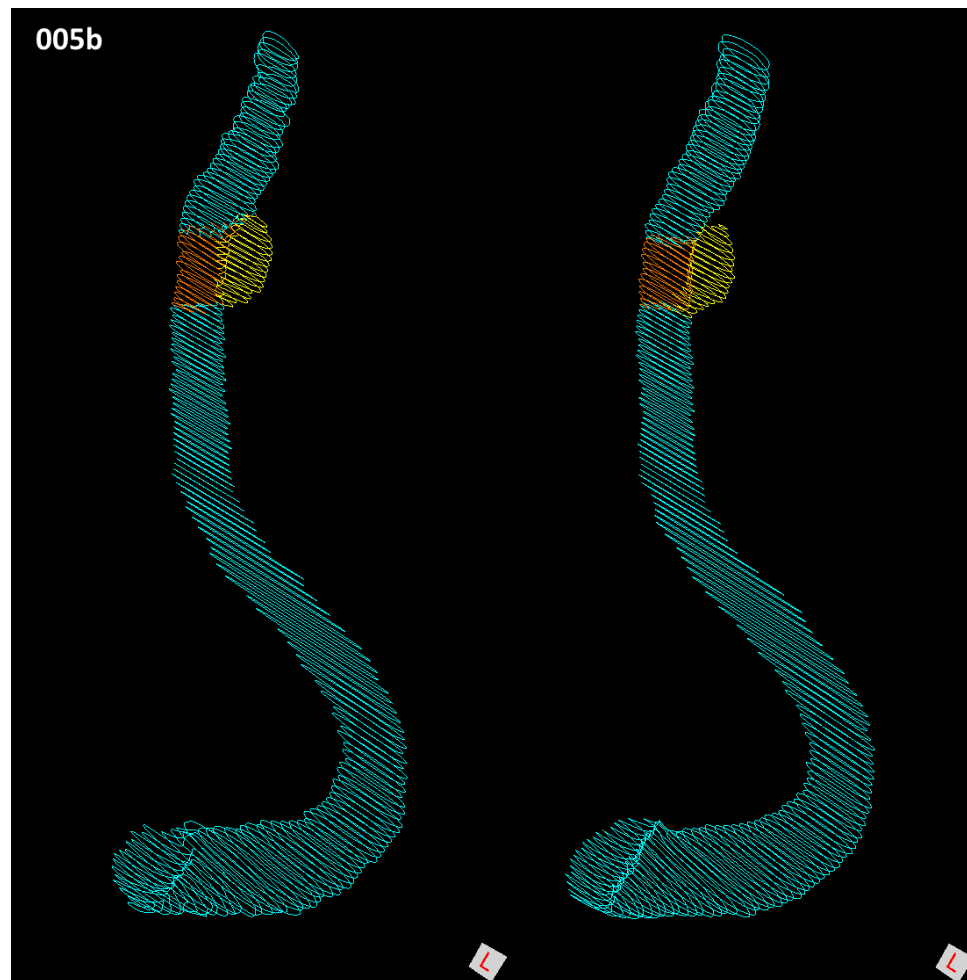



Case 006a

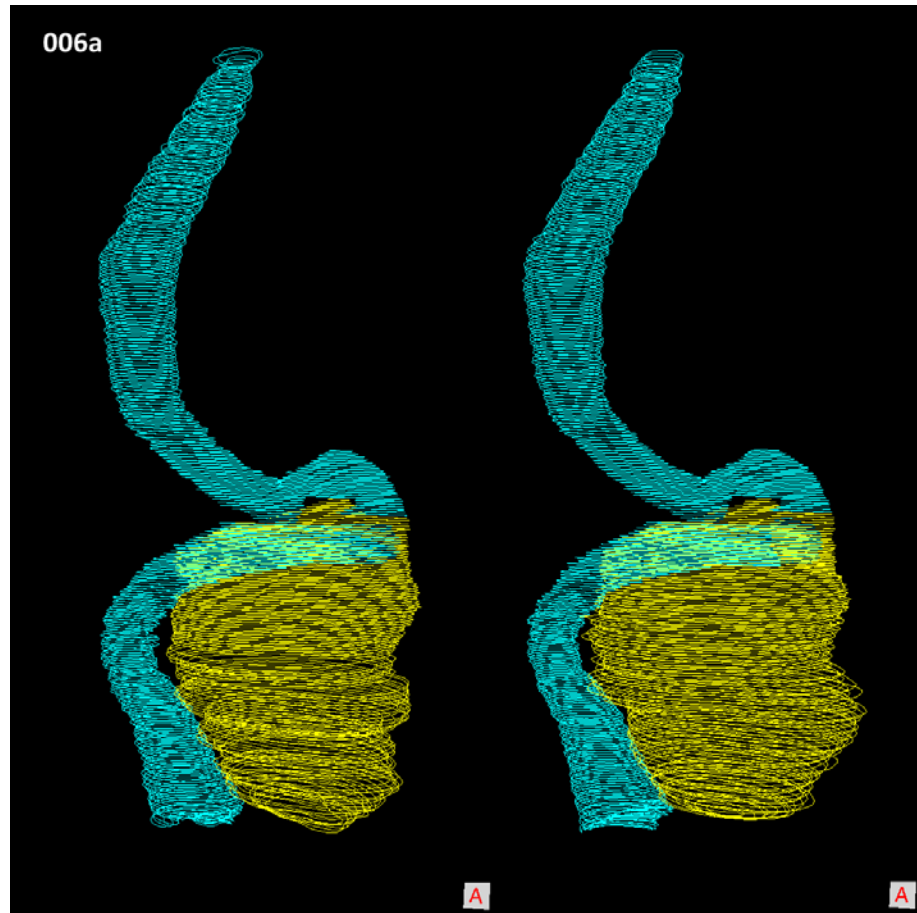

Case 006b

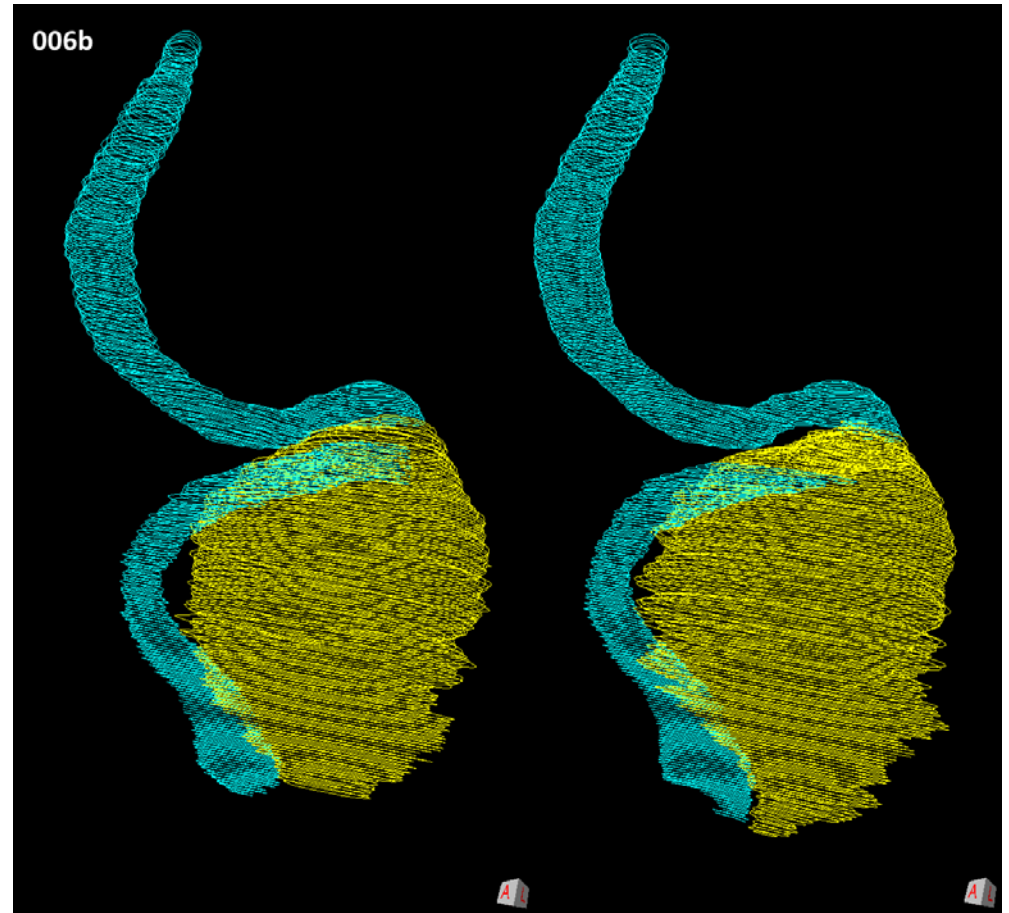

Case 007a

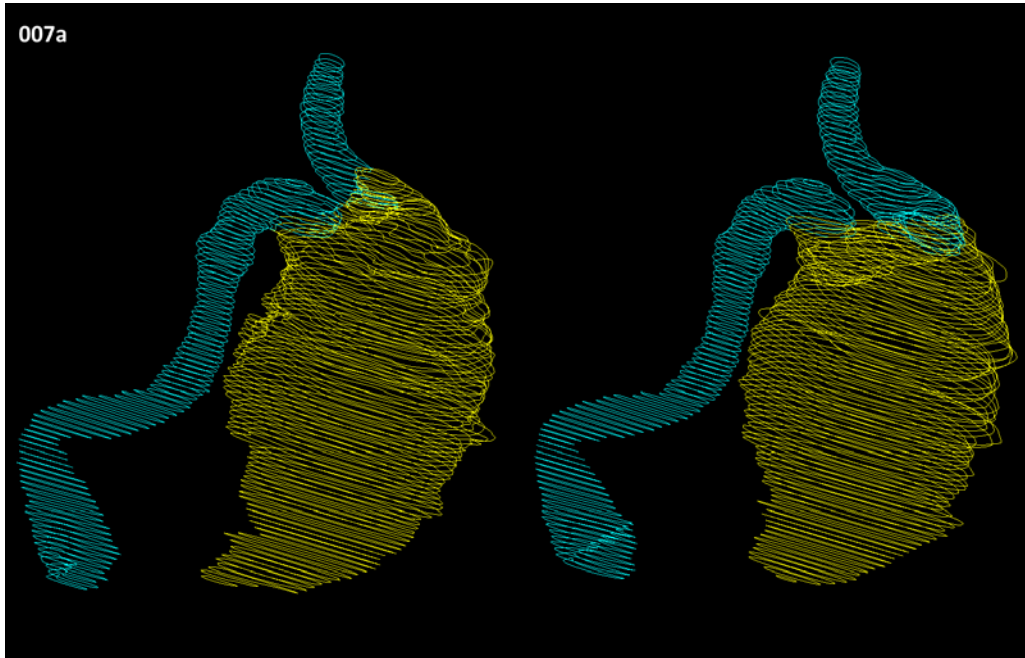

Case 007b

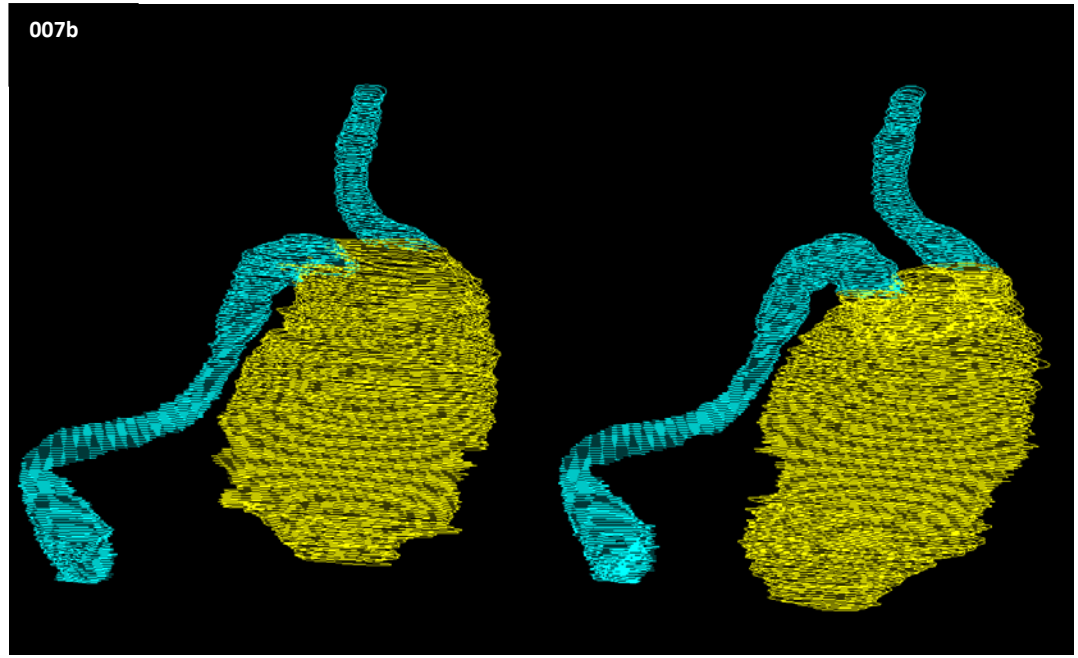

Case 008a

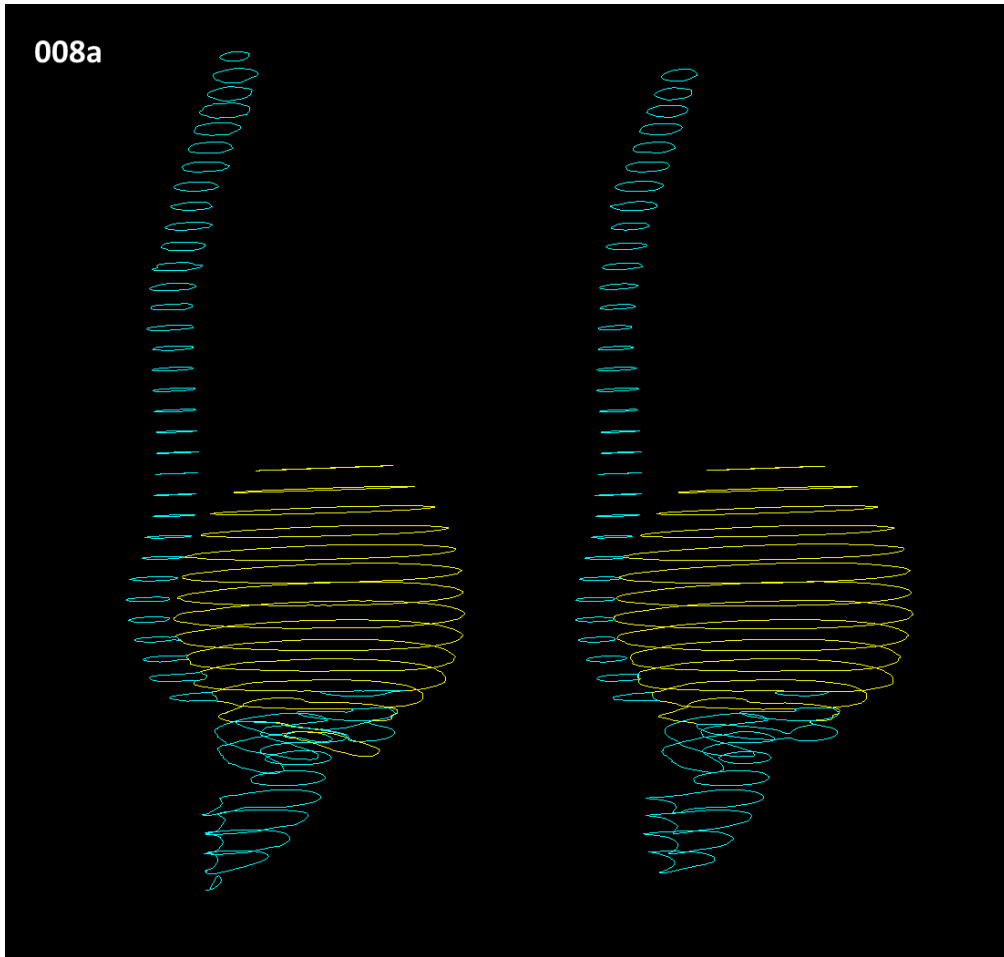

Case 008b

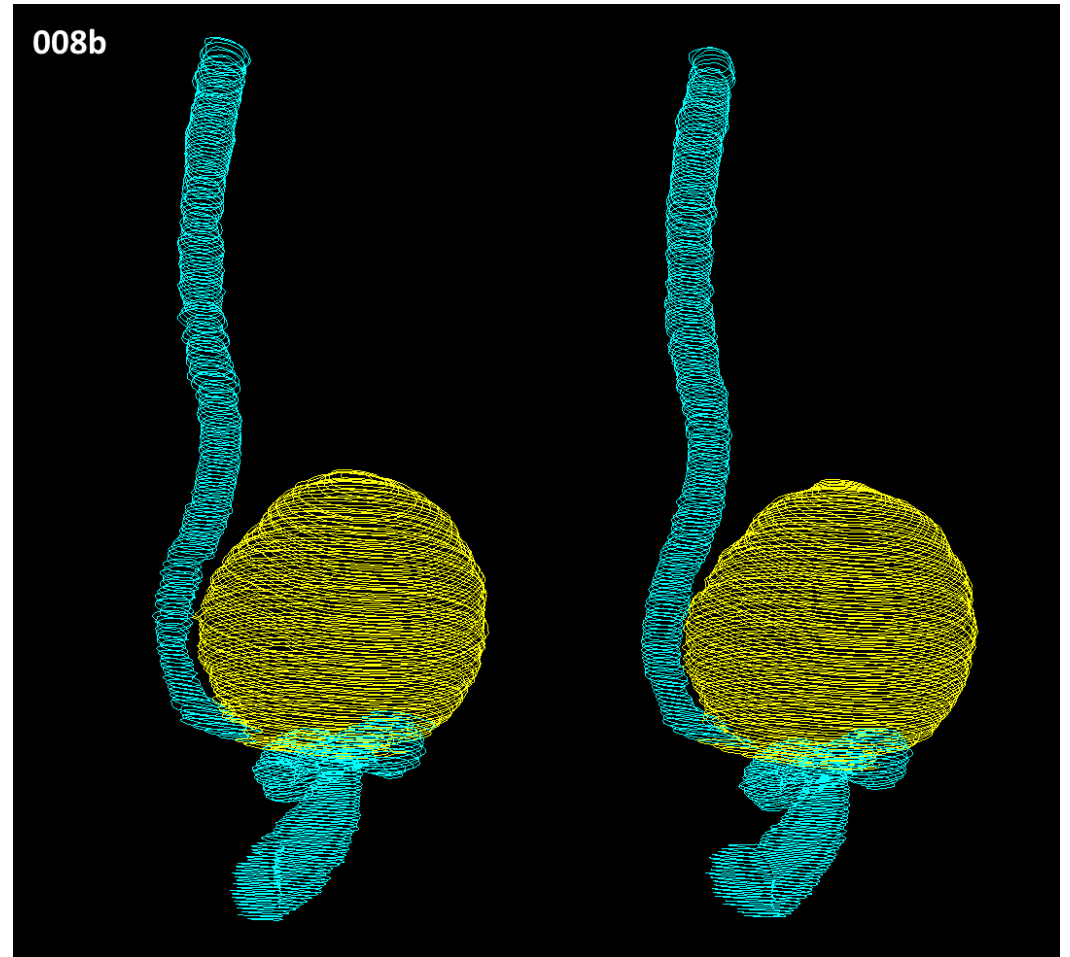

Case 009a

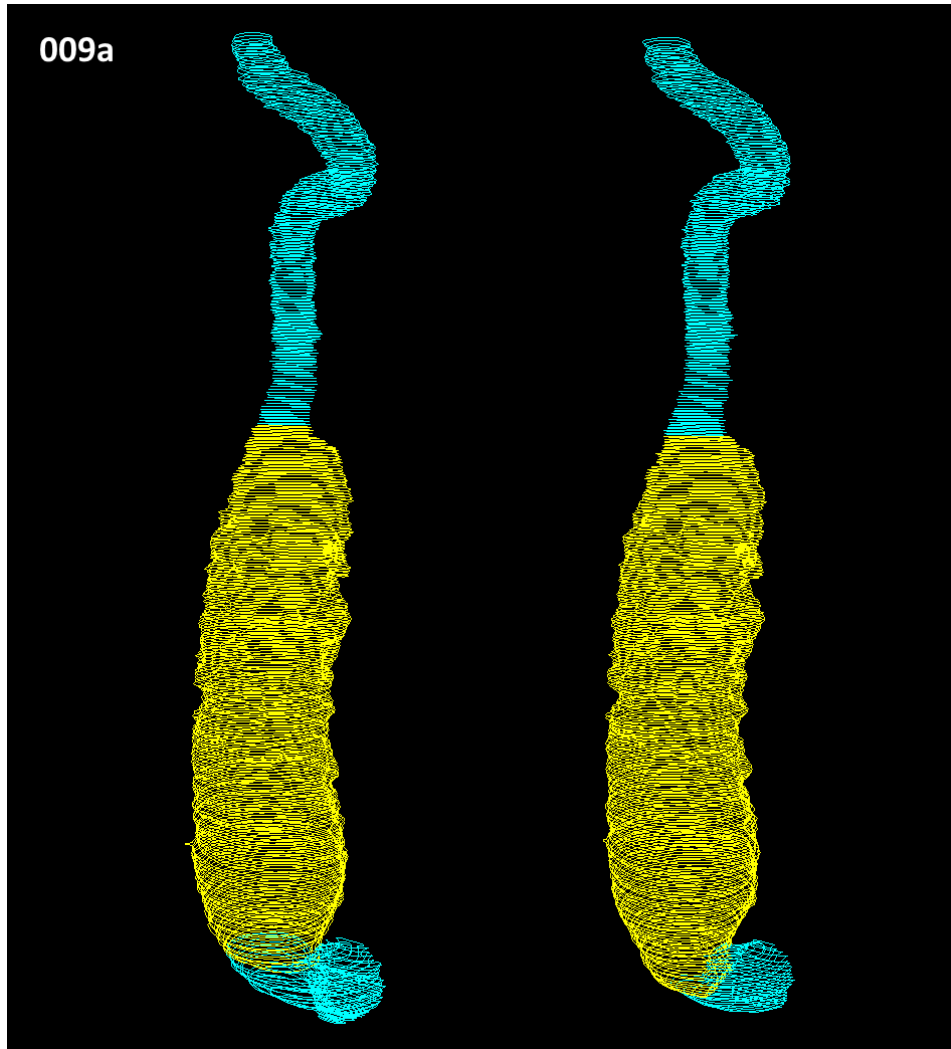

Case 009b

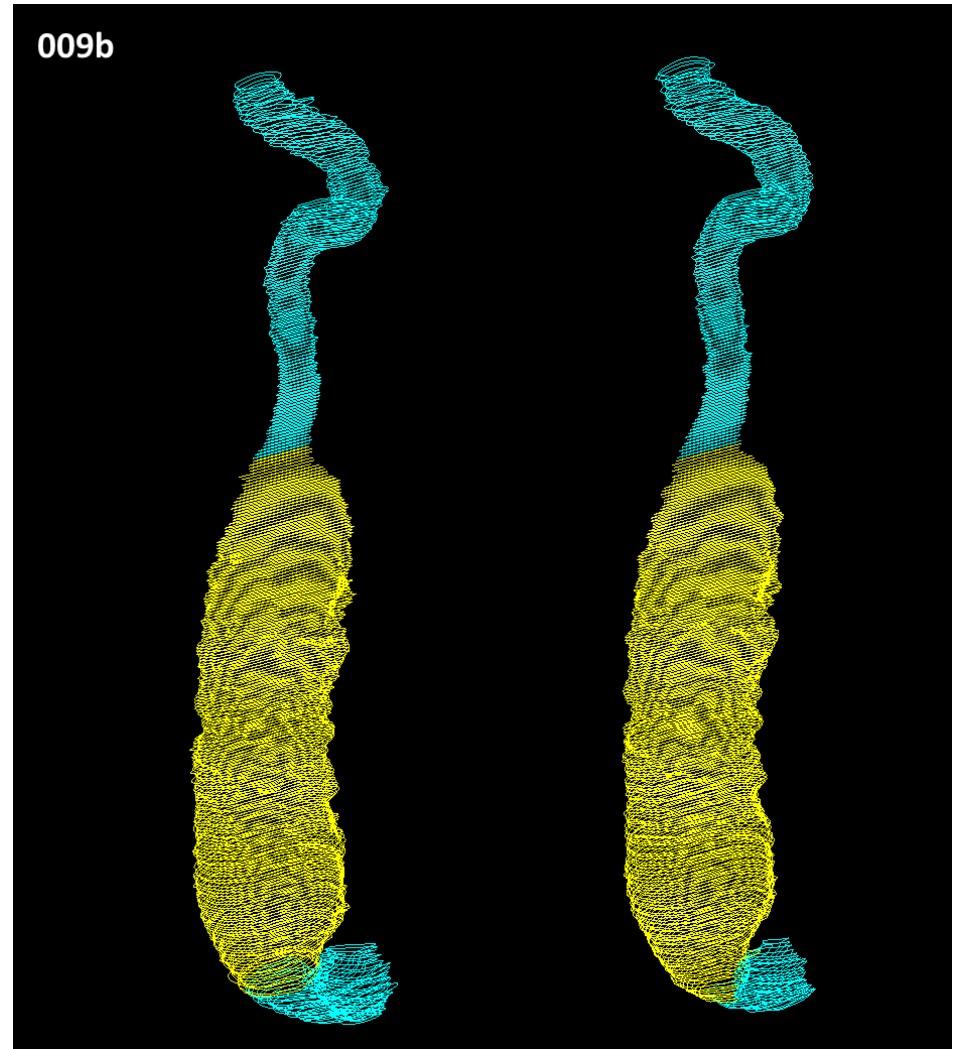

Case 010a

Case 010b

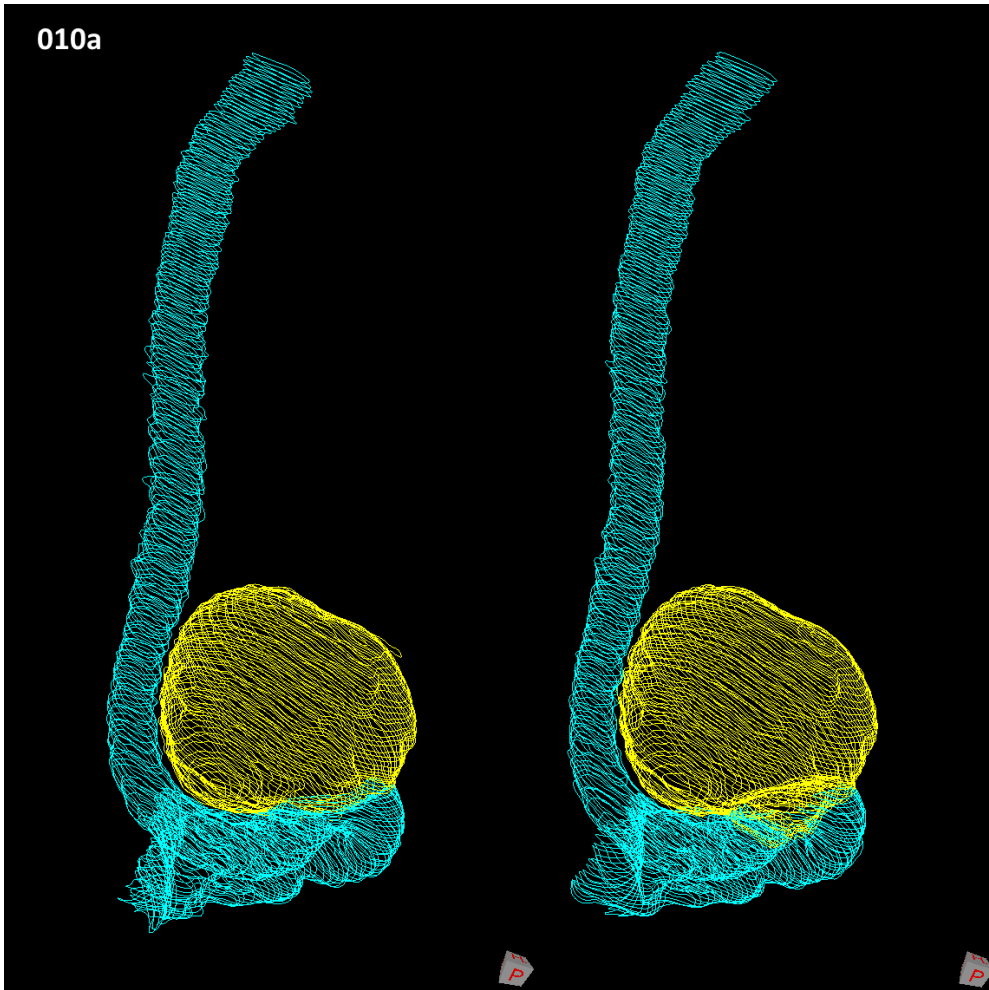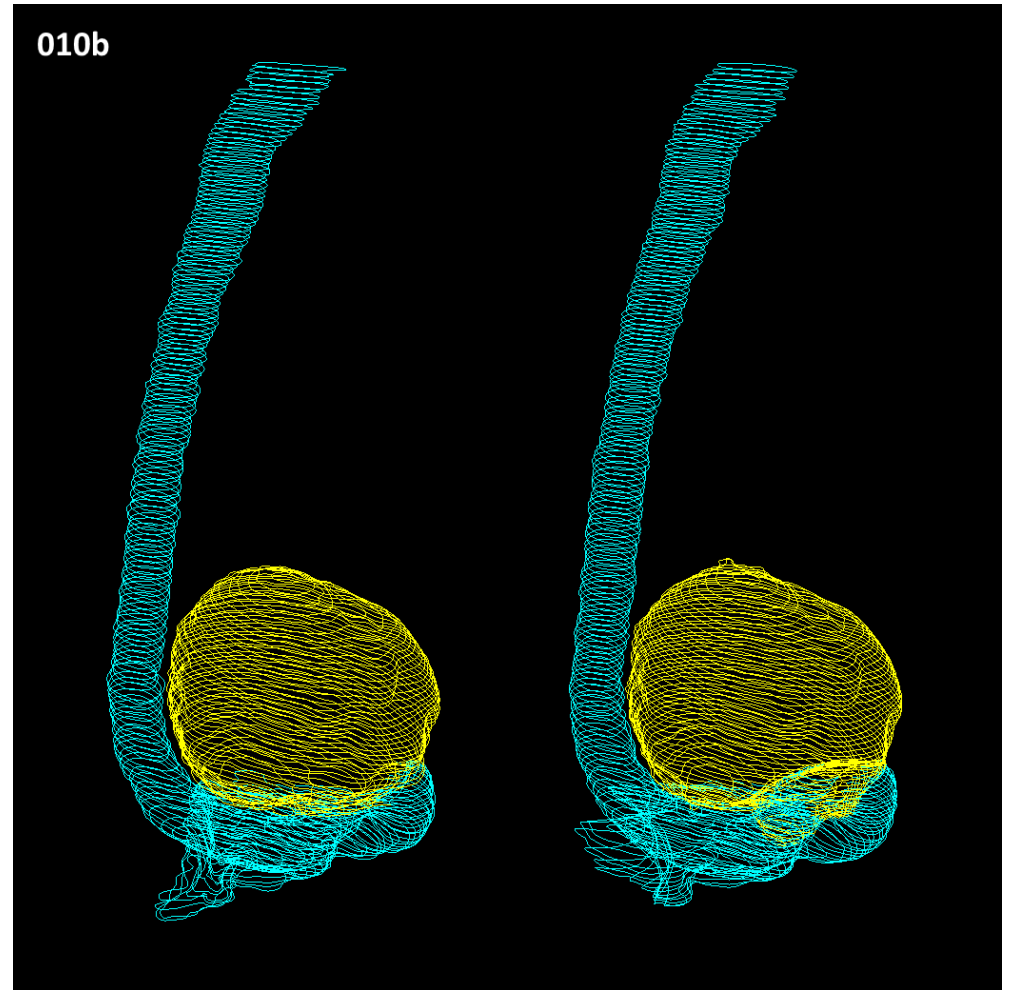

Case 011a

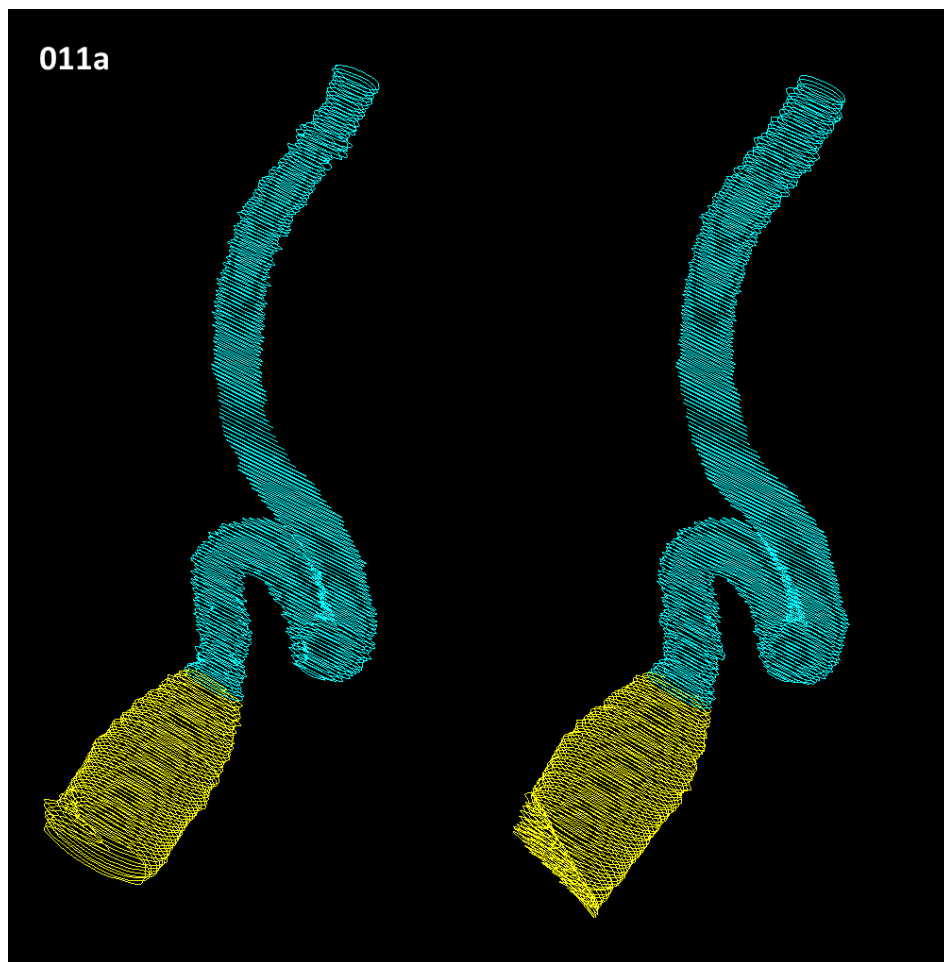

Case 011b

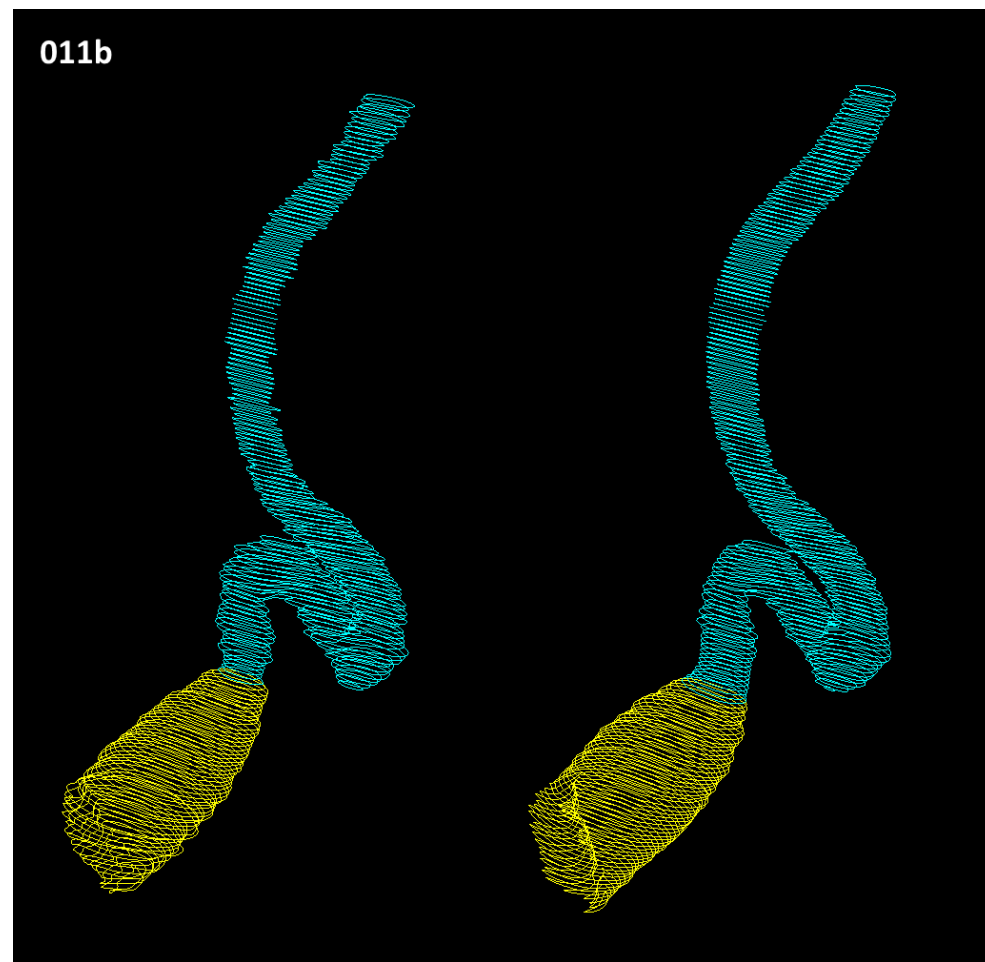

Case 012a

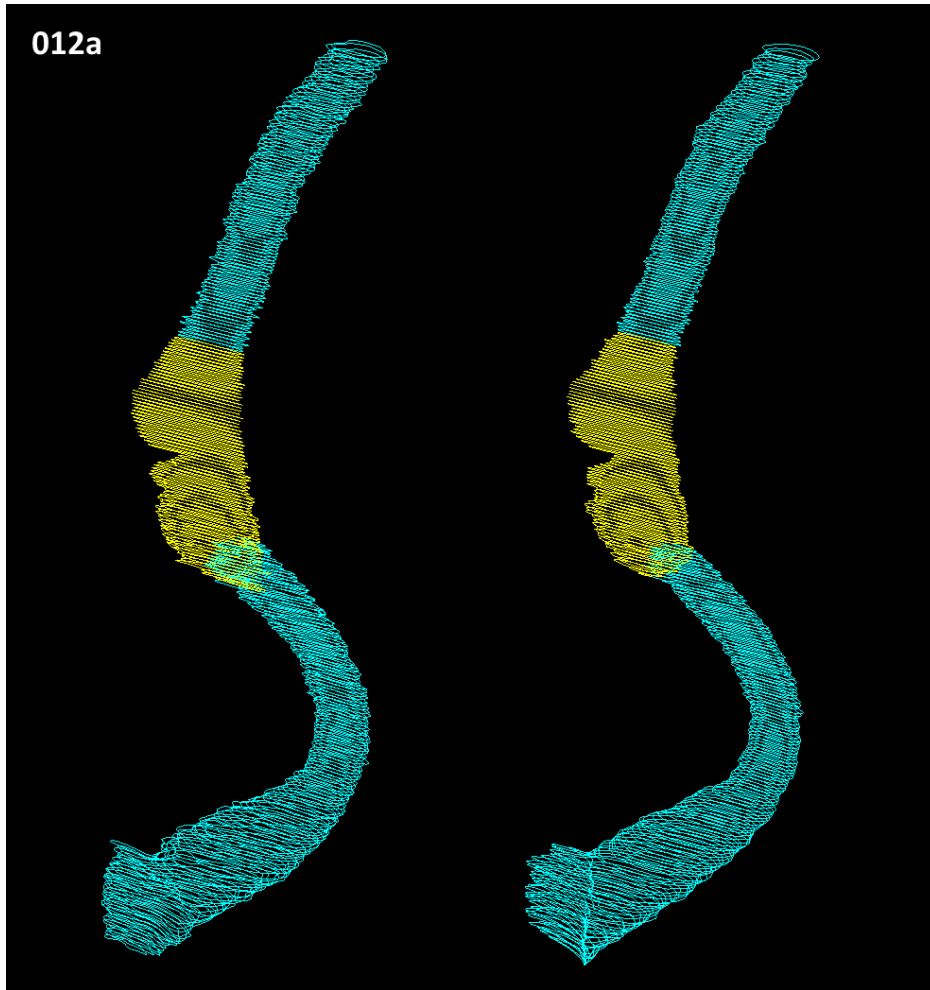

Case 012b

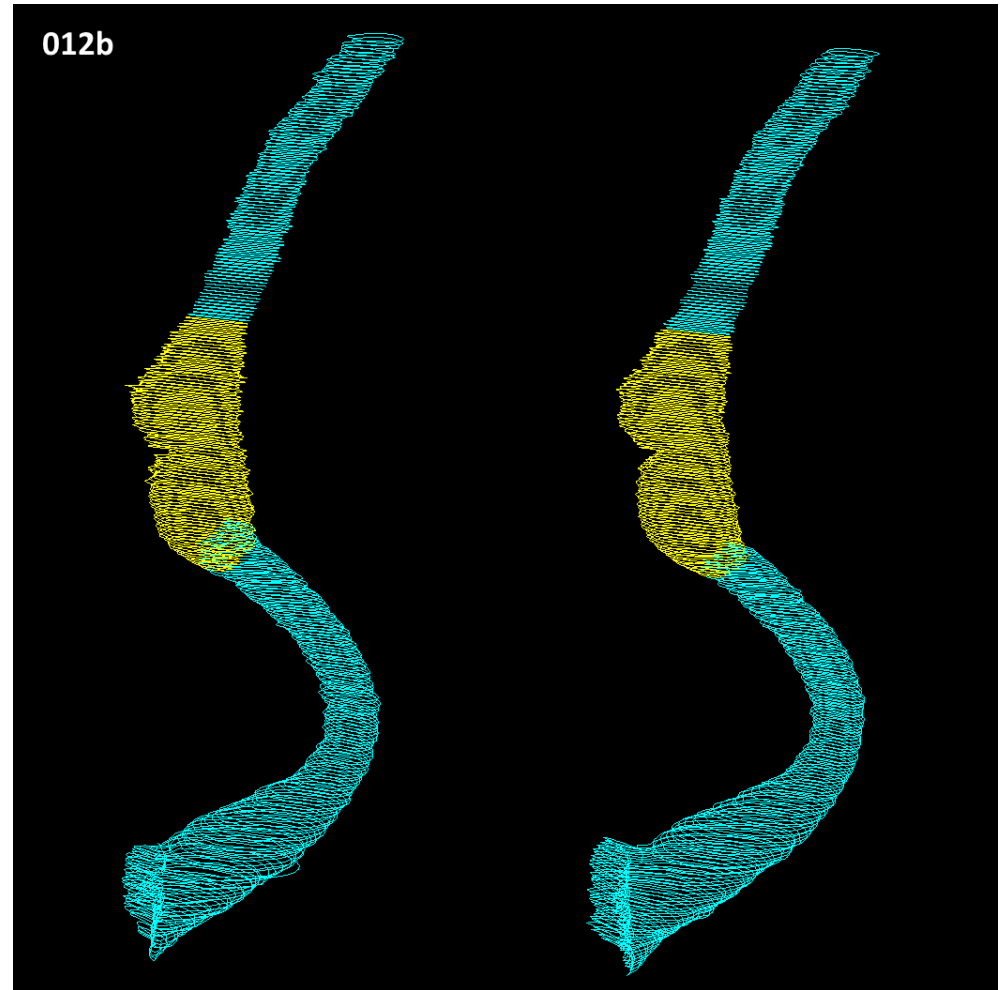

Case 013a

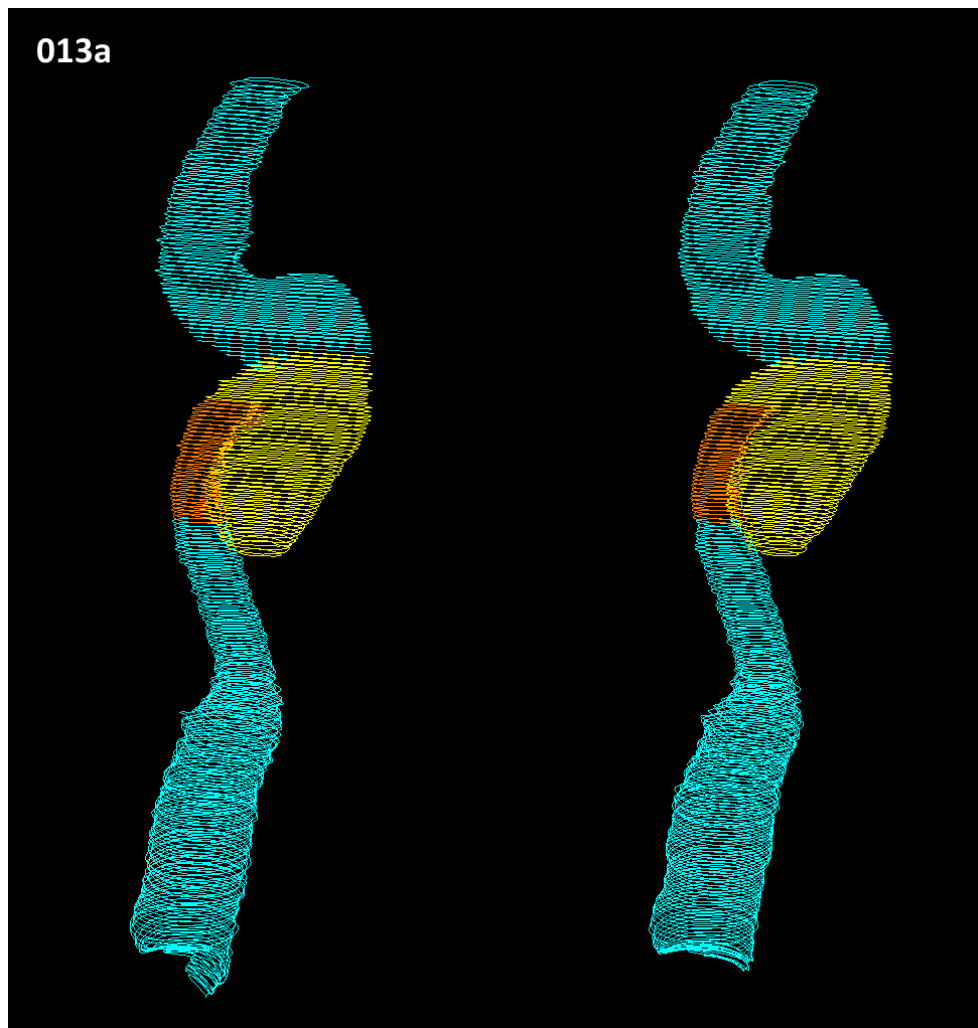

Case 013b

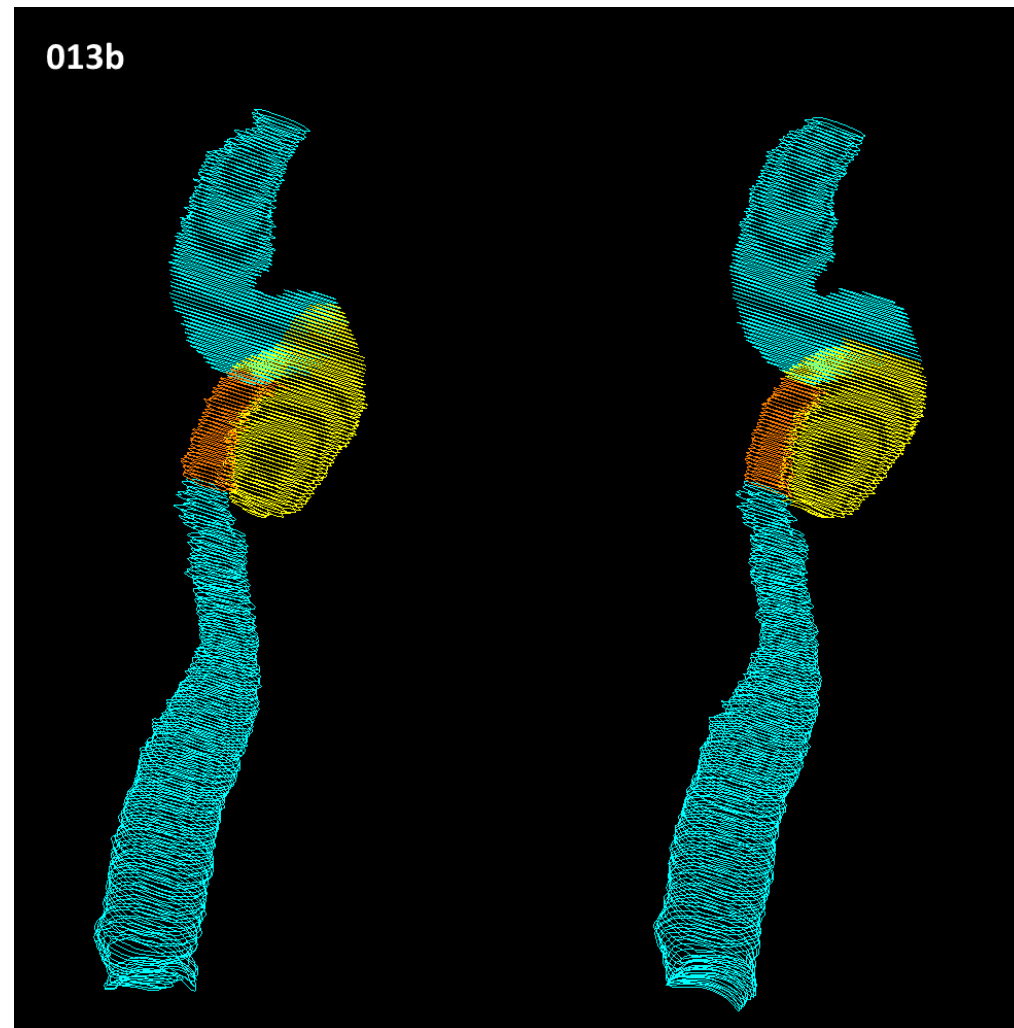



Case 014a

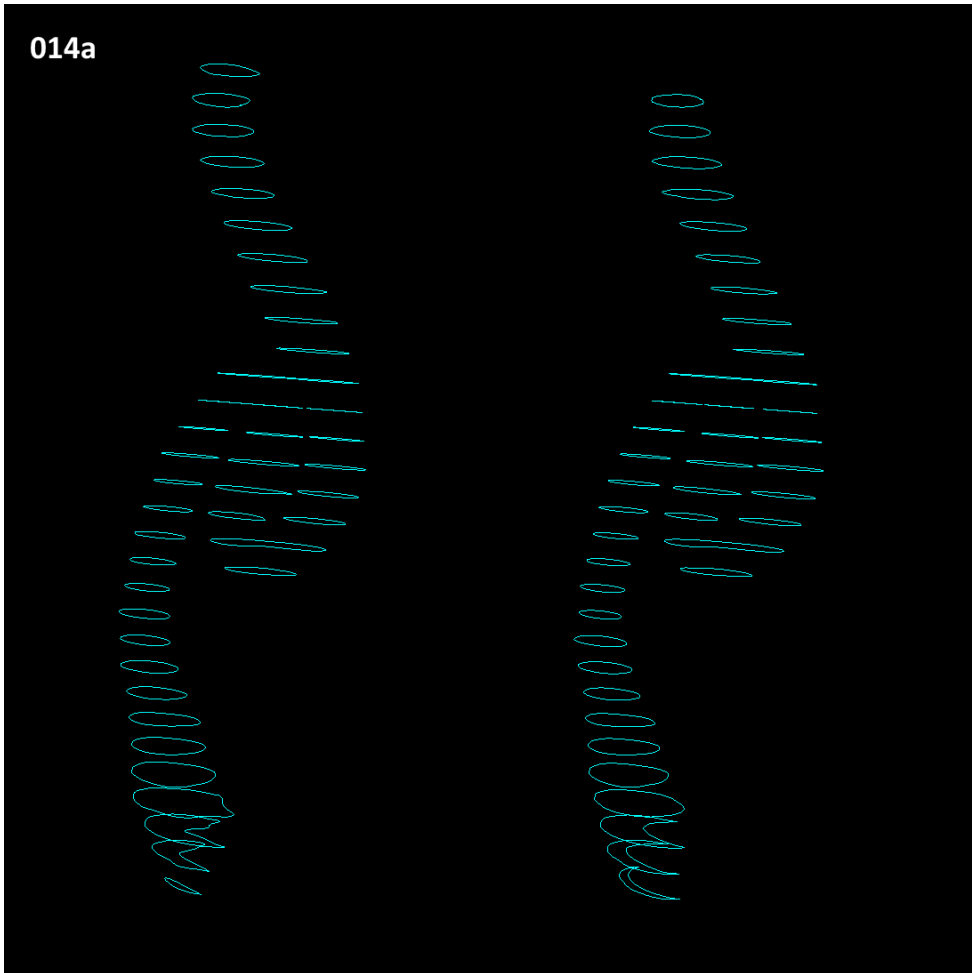

Case 014b

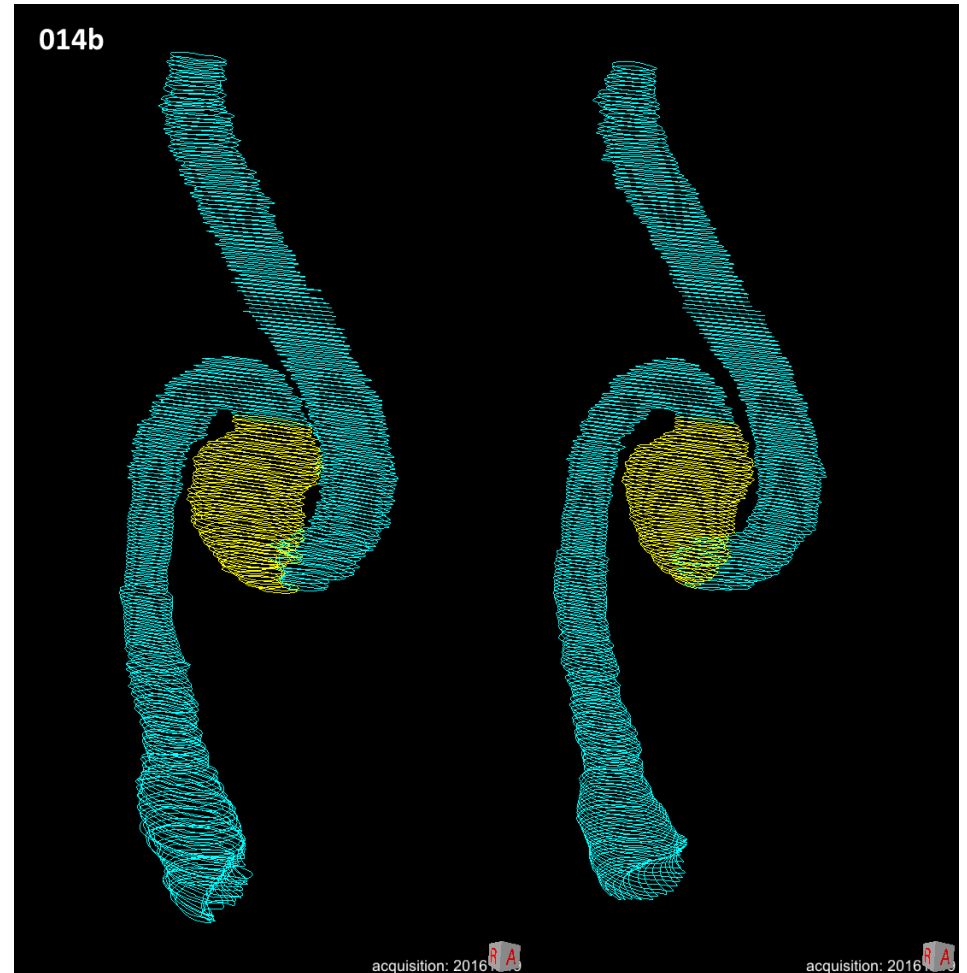

Case 015a

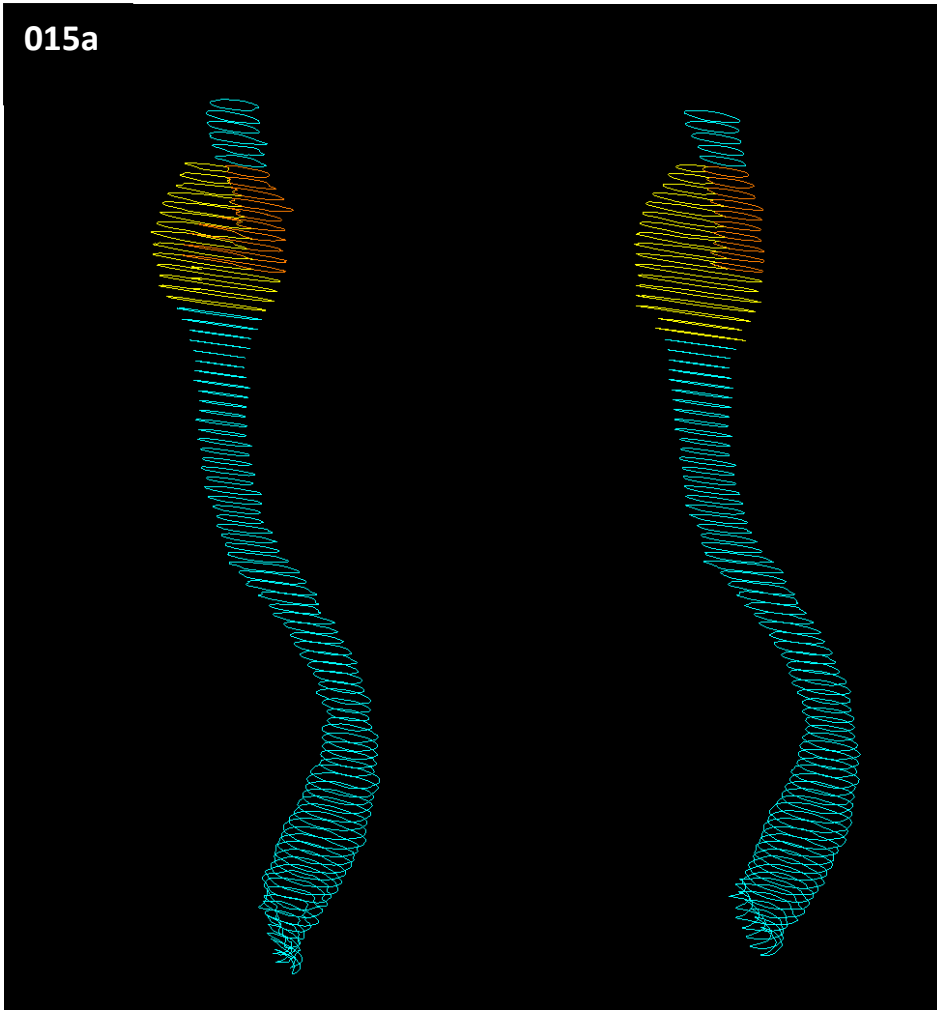

Case 015b

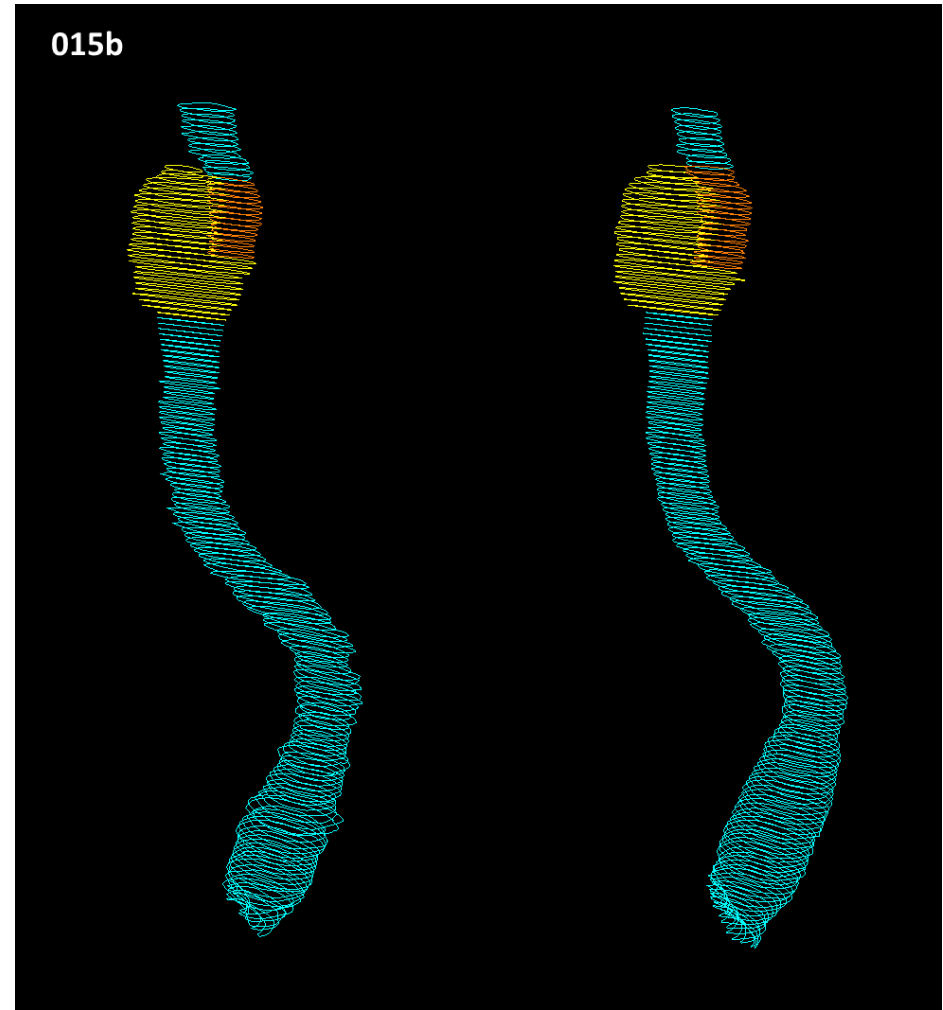

Case 016a

Case 016b

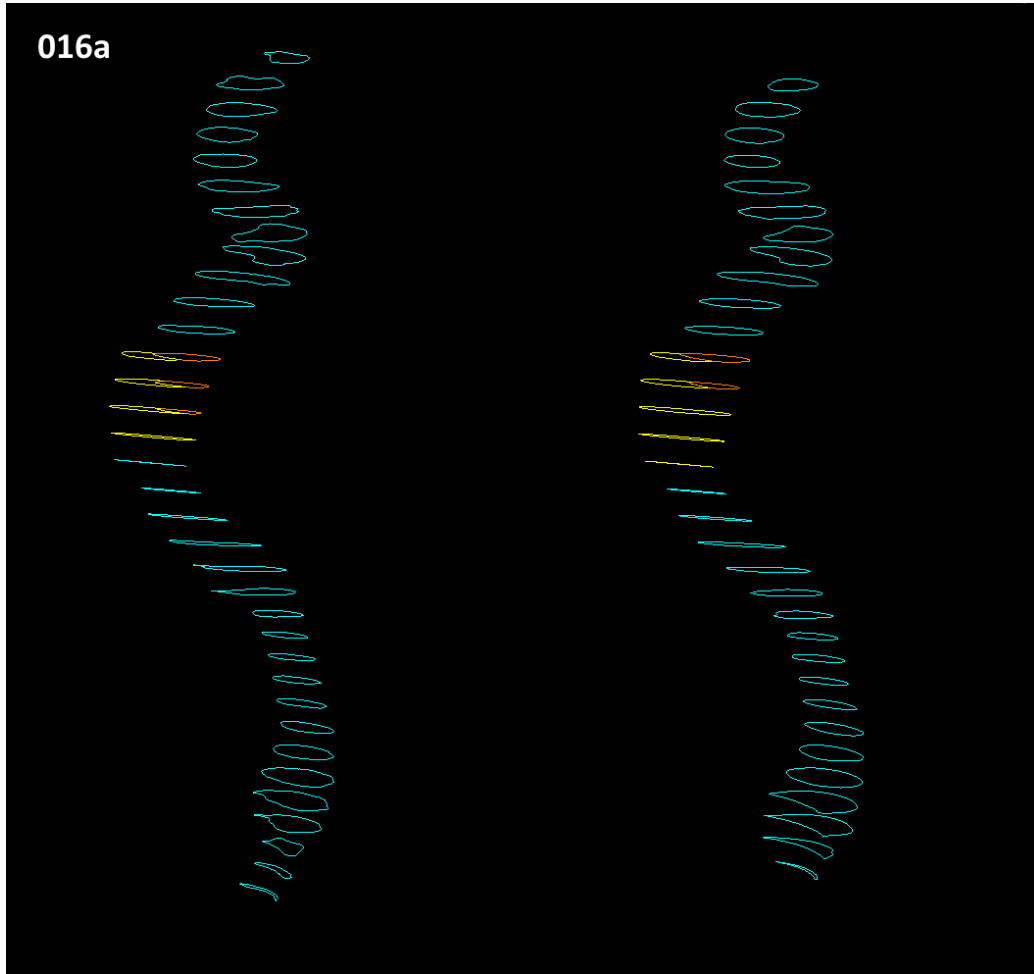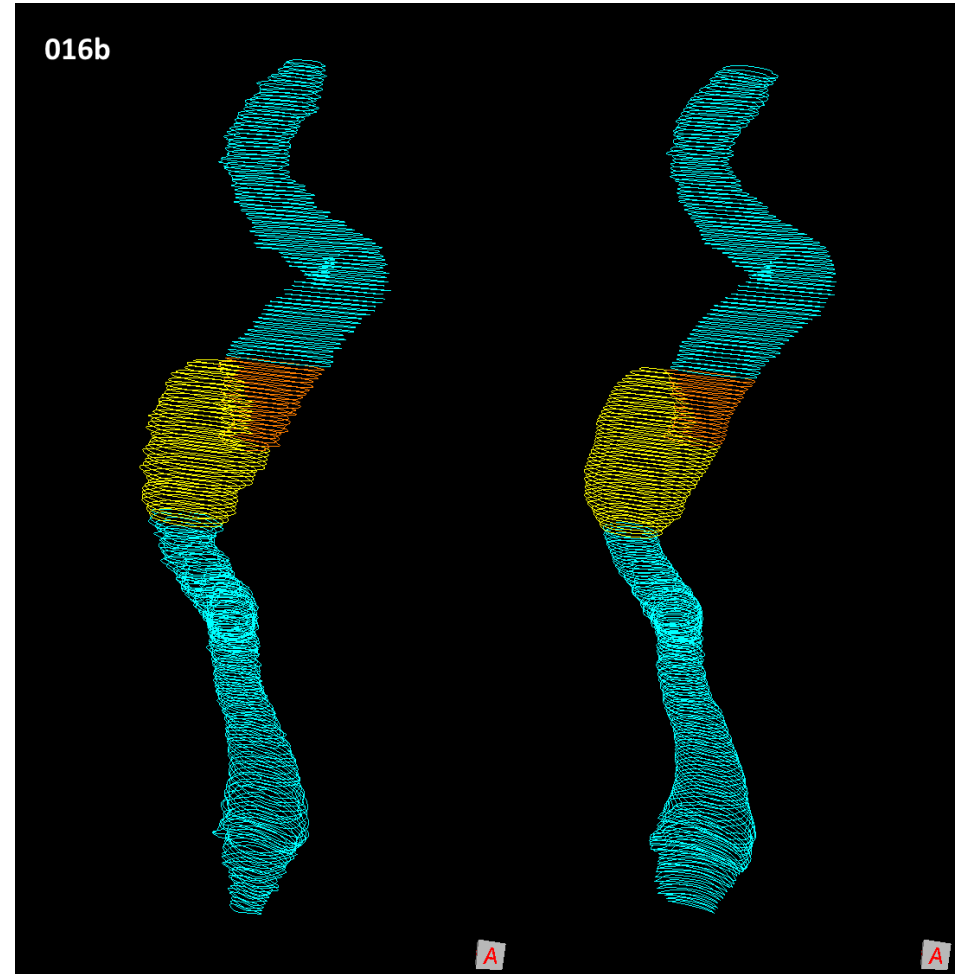

Case 017a

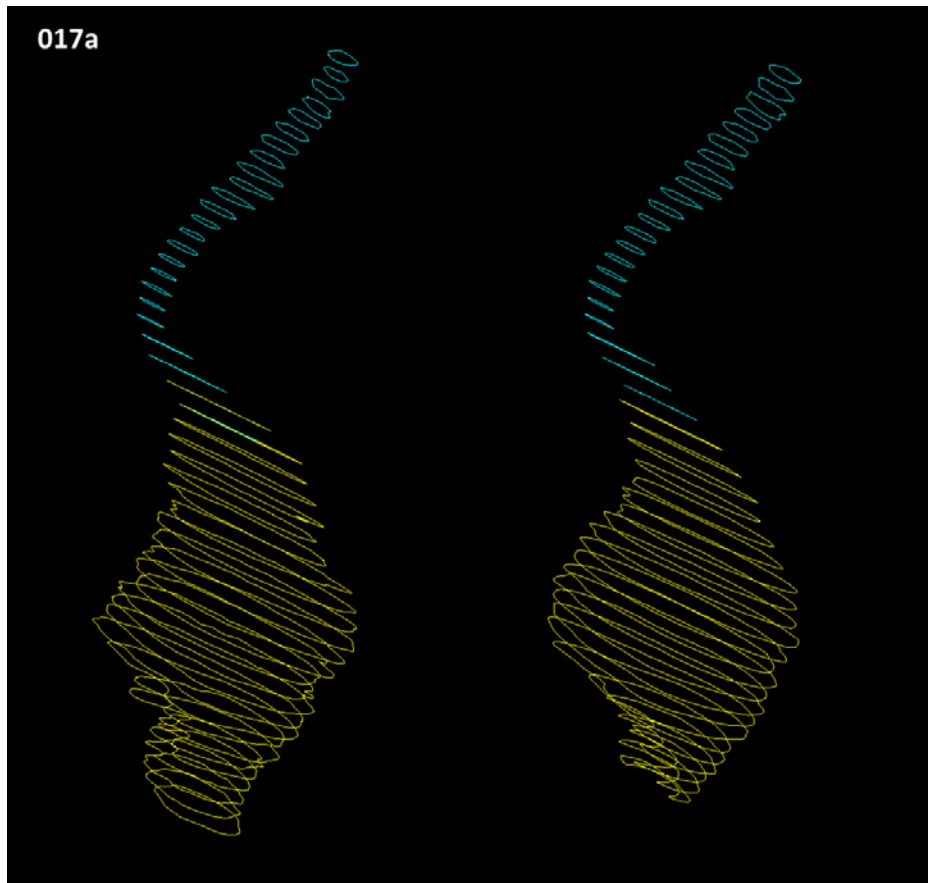

Case 017b

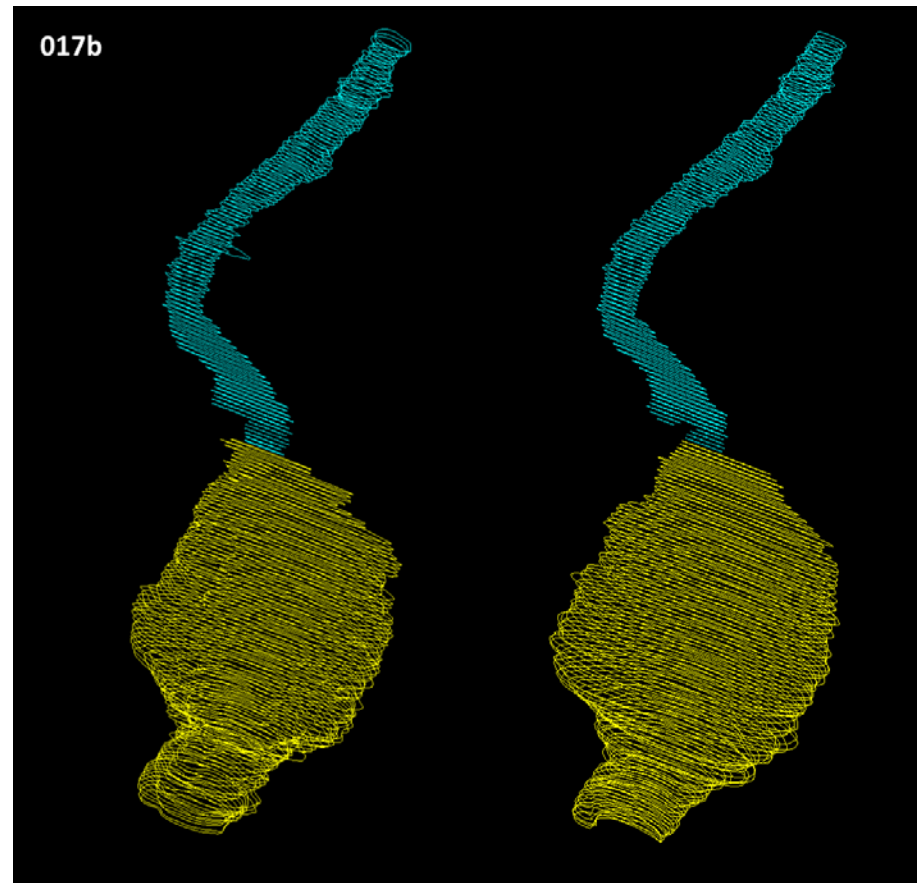

Case 018a

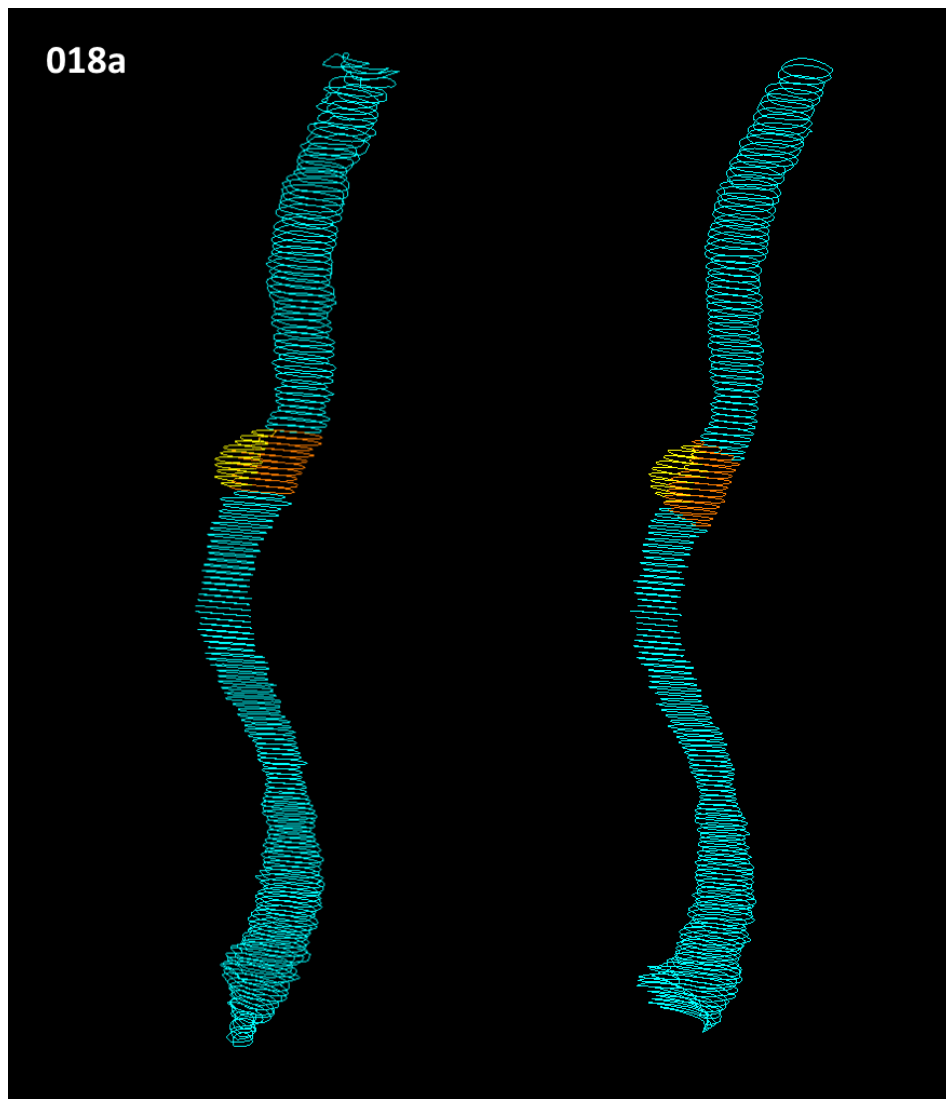

Case 018b

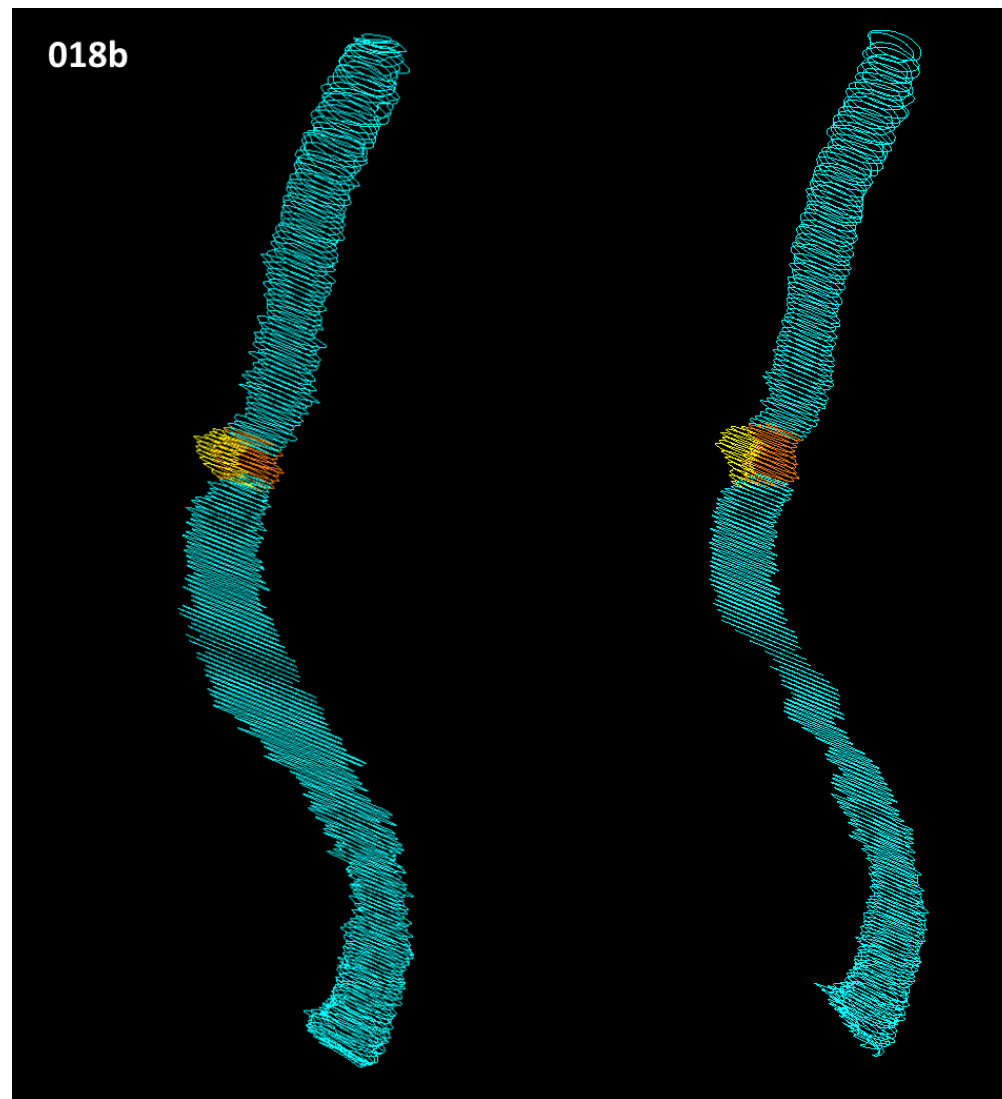

Case 019a

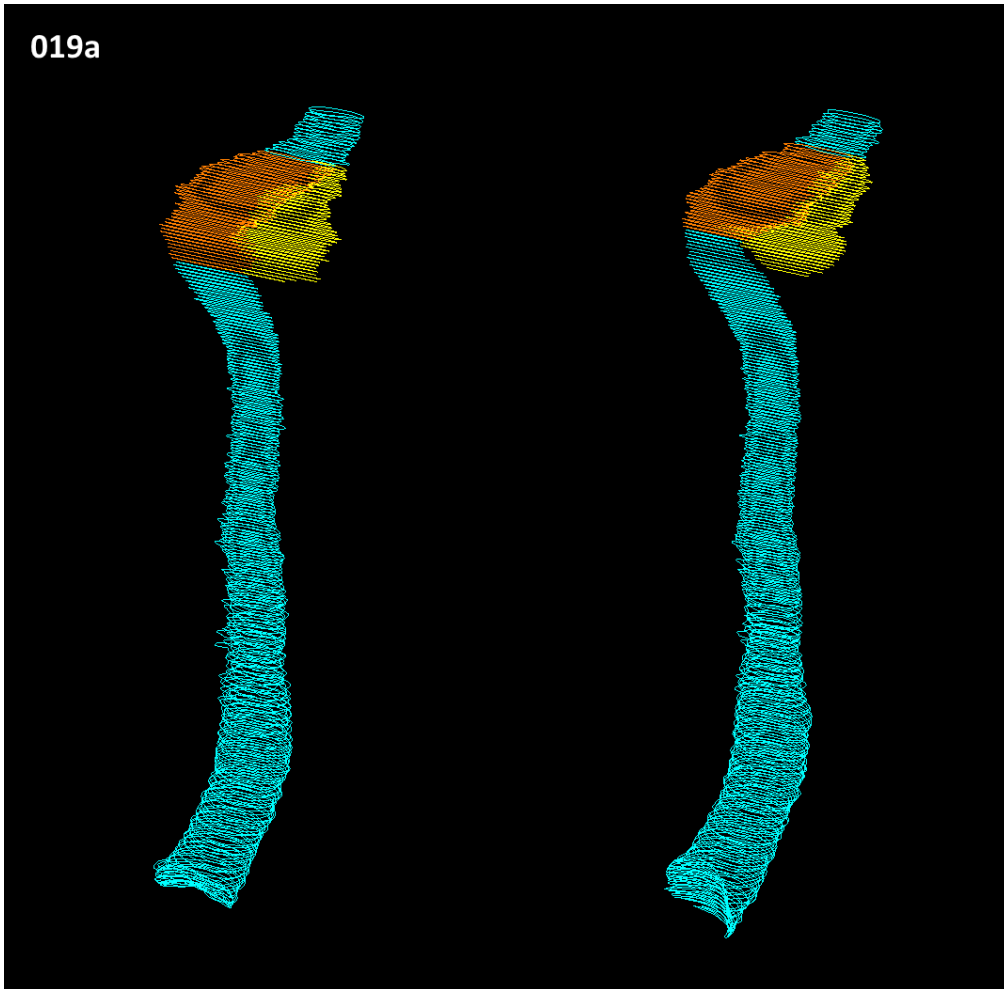

Case 019b

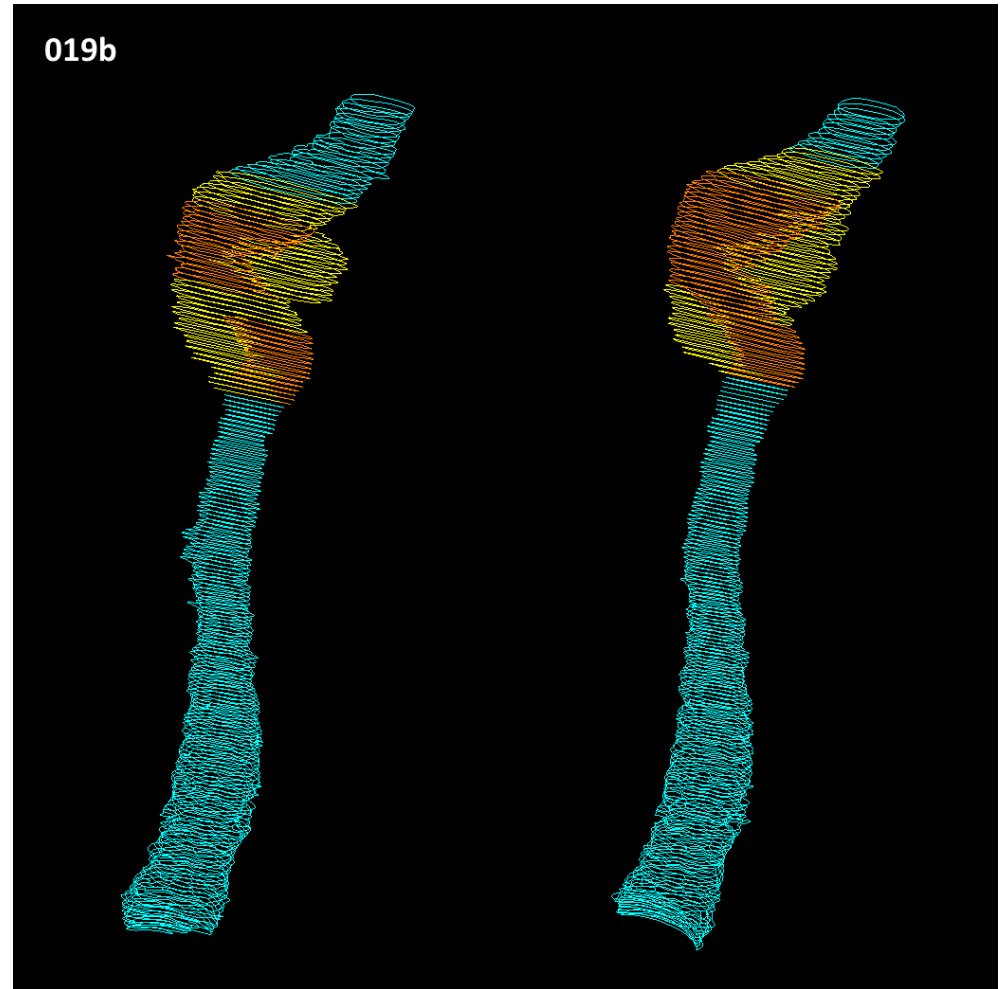

Case 020a

Case 020b

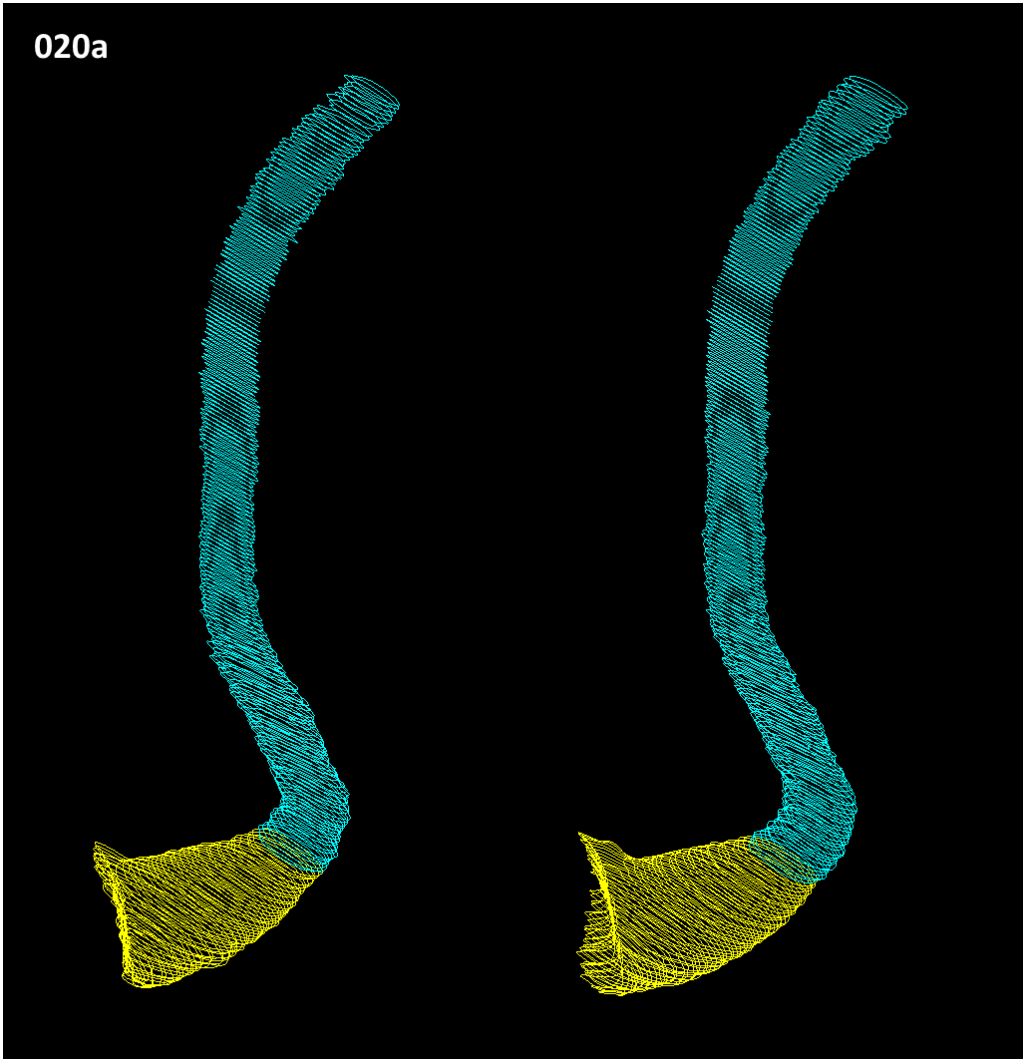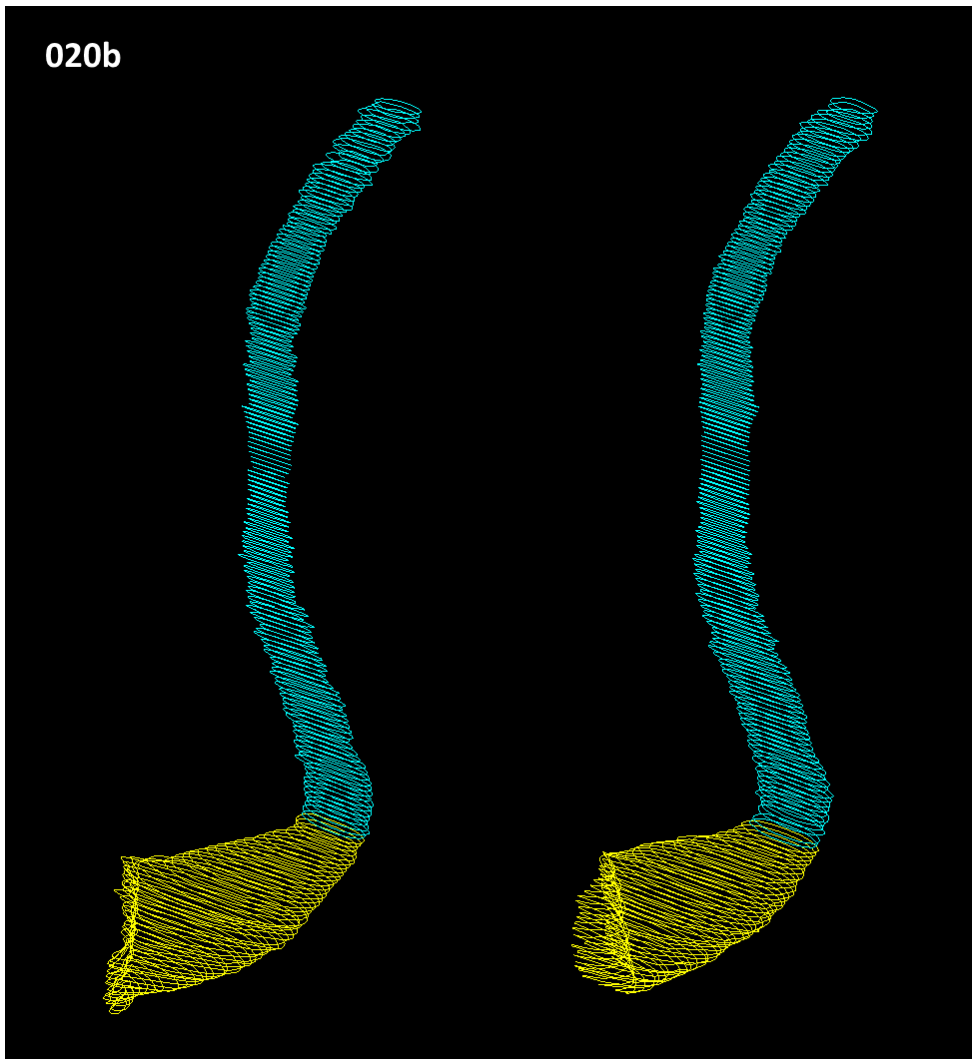

## APPENDIX C

**Supplemental figure A1-4.** Bland-Altman plots showing agreement of two observers on the volume measurement of 40 scans according to the three subfield segmentations, as well as the intraobserver agreement of both observers. The line in the middle represents the mean difference of the volume between the two observers, and the dotted lines represent the upper and lower limits of agreement (mean difference  $\pm 1.96 \times$  standard deviation).

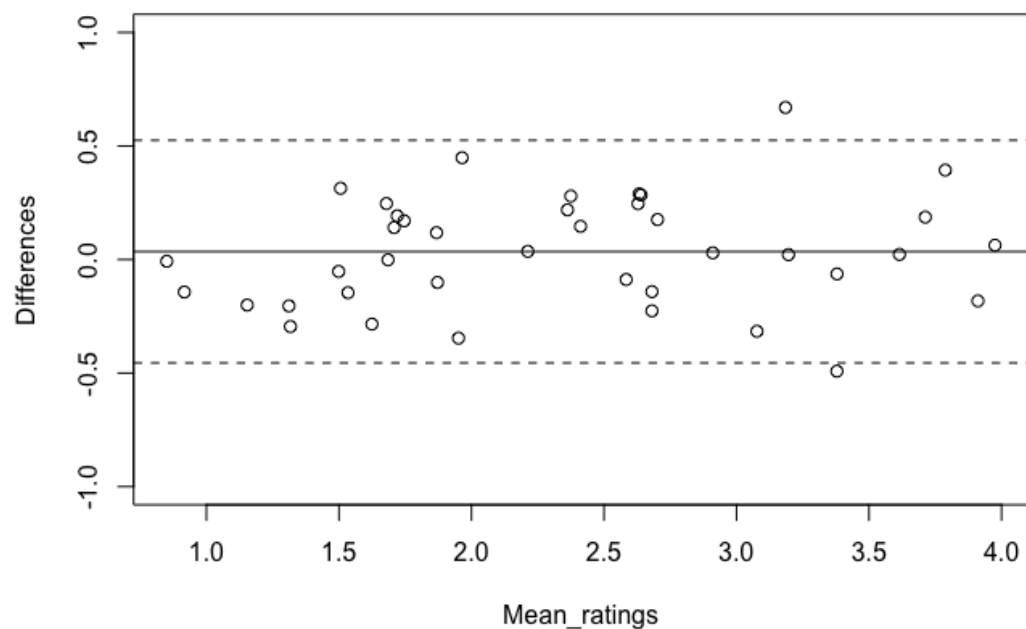

**A1.** Bland-Altman plot of subfield segmentation "only vessel".  
sac".

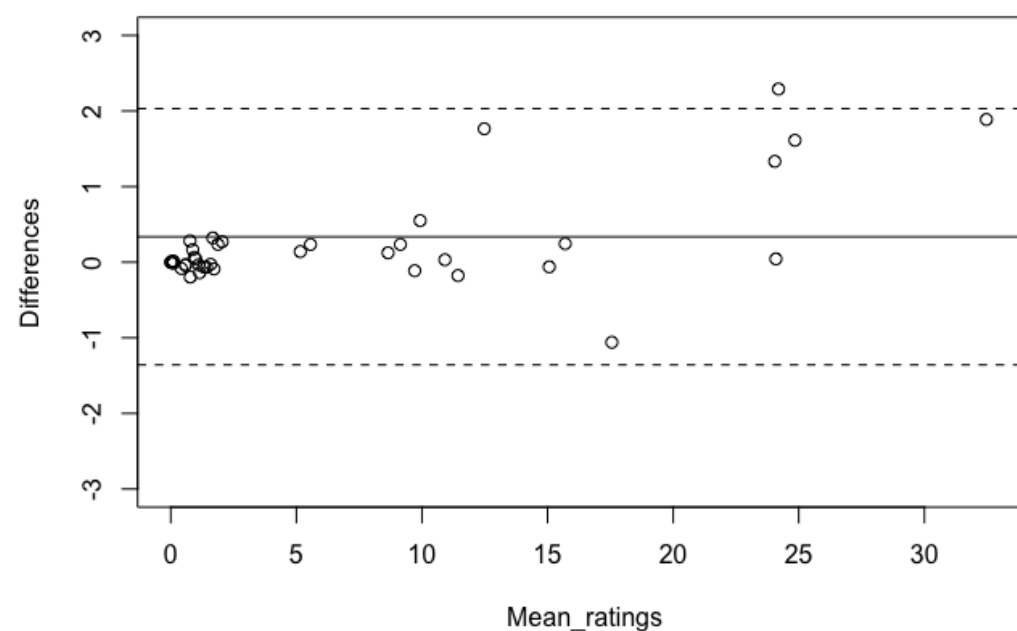

**A2.** Bland-Altman plot of subfield segmentation "aneurysm  
sac".



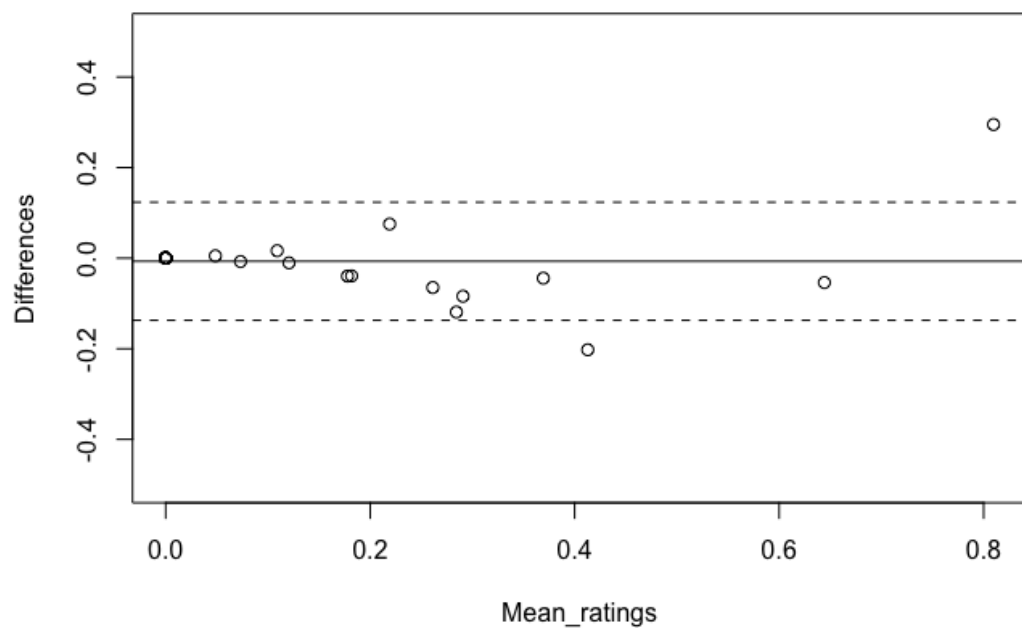

**A3. Bland-Altman plot of subfield segmentation "vessel adjacent to aneurysm sac" (top left).**

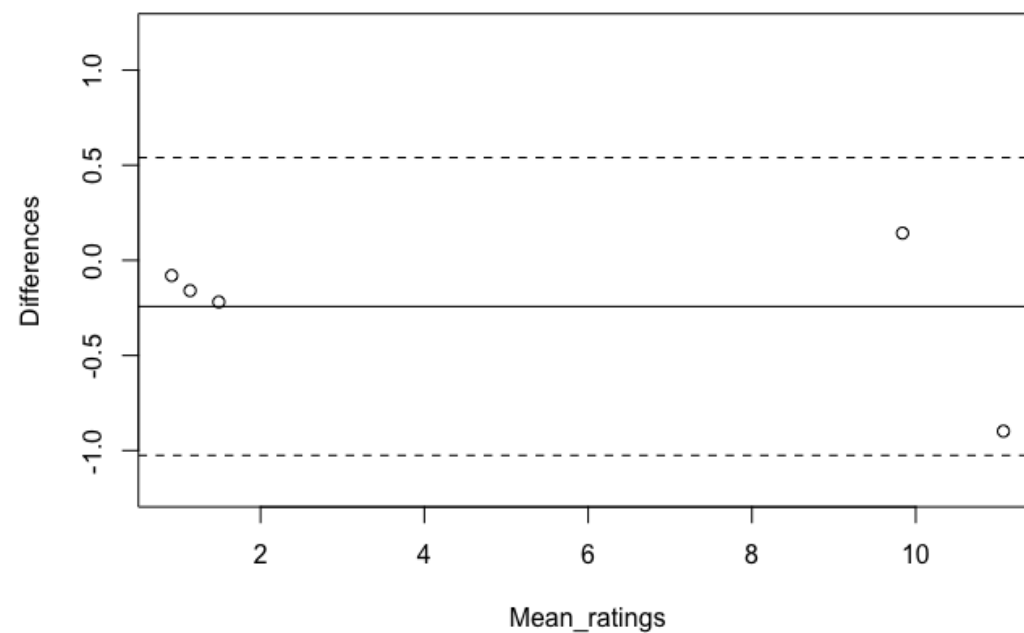

**A4. Bland-Altman plots of the intraobserver agreement of measurement method 2 for subset of 5 randomly selected cases, for observer 1 (top right) and observer 2 (bottom right).**

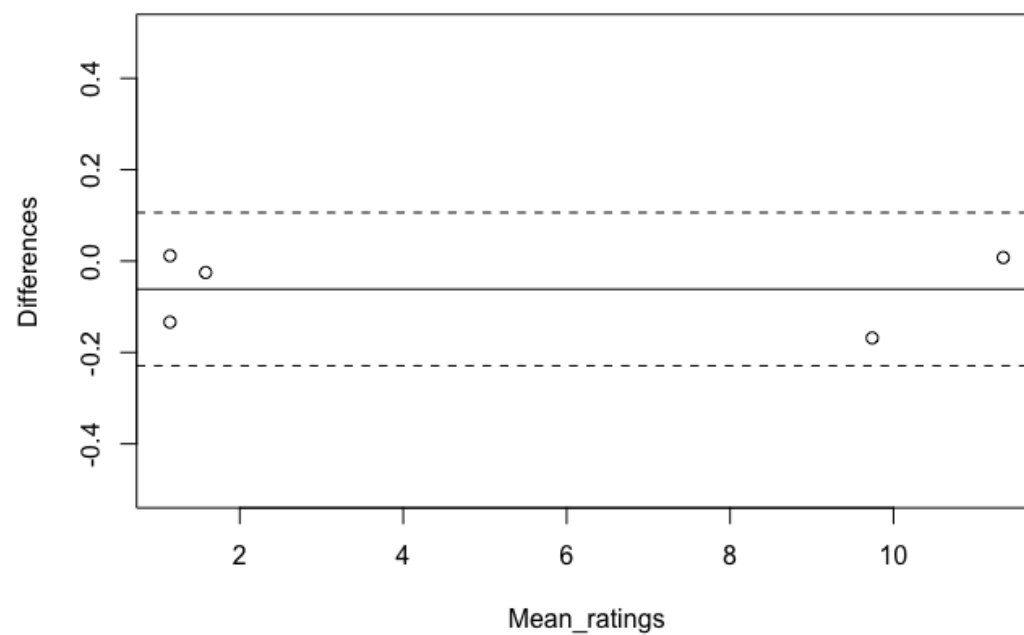

Supplement: 41598_2019_44553_MOESM1_ESM.pdf [file 41598_2019_44553_MOESM1_ESM.pdf]
